# Supplementary material for: Repression of CHROMOMETHYLASE 3 prevents epigenetic collateral damage in Arabidopsis
Source: eLife journal article supplement (doi:10.7554/elife.69396), 2021-07-23
Supplement: supp [file elife-69396-supp-v2.zip]

**Title:** Repression of CHROMOMETHYLASE 3 Prevents Epigenetic Collateral Damage in Arabidopsis

**Authors:** Ranjith K. Papareddy<sup>1,4,\*</sup>, Katalin Páldi<sup>1,4</sup>, Anna D. Smolka<sup>1</sup>, Patrick Hübner<sup>1,2</sup>, Claude Becker<sup>1,2</sup>, Michael D. Nodine<sup>1,3,\*</sup>

**Affiliations:** <sup>1</sup>Gregor Mendel Institute (GMI), Austrian Academy of Sciences, Vienna Biocenter (VBC), Dr. Bohr-Gasse 3, 1030 Vienna, Austria; <sup>2</sup>Genetics, LMU Biocenter, Ludwig-Maximilians University, Martinsried, 82152, Germany; <sup>3</sup>Laboratory of Molecular Biology, Wageningen University, Wageningen, 6708 PB, the Netherlands; <sup>4</sup>These authors contributed equally to this work. \*Corresponding authors

**Correspondence:** michael.nodine@wur.nl and rpapareddy1@ucla.edu

**Key words:** DNA methylation, chromatin, microRNA, gene regulation, epimutation

## Abstract

20

21 DNA methylation has evolved to silence mutagenic transposable elements (TEs) while typically  
22 avoiding the targeting of endogenous genes. Mechanisms that prevent DNA methyltransferases  
23 from ectopically methylating genes are expected to be of prime importance during periods of  
24 dynamic cell cycle activities including plant embryogenesis. However, virtually nothing is known  
25 regarding how DNA methyltransferase activities are precisely regulated during embryogenesis  
26 to prevent the induction of potentially deleterious and mitotically stable genic epimutations.  
27 Here, we report that microRNA-mediated repression of CHROMOMETHYLASE 3 (CMT3) and  
28 the chromatin features that CMT3 prefers help prevent ectopic methylation of thousands of  
29 genes during embryogenesis that can persist for weeks afterwards. Our results are also  
30 consistent with CMT3-induced ectopic methylation of promoters or bodies of genes undergoing  
31 transcriptional activation reducing their expression—corresponding transcript levels. Therefore,  
32 the repression of CMT3 prevents epigenetic collateral damage on endogenous genes. We also  
33 provide a model that may help reconcile conflicting viewpoints regarding the functions of  
34 gene-body methylation that occurs in nearly all flowering plants.

## 35 IntroductionINTRODUCTION

36 Methylation of DNA encoding transposable elements (TE) is required to silence their expression  
37 and consequently prevent them from mobilizing and mutagenizing genomes (Kato et al., 2003;  
38 Law and Jacobsen, 2010). Complex mechanisms have evolved to balance the high degree of  
39 sensitivity needed to direct methylation and silencing of TEs with the precision required to  
40 prevent ectopic methylation of endogenous genes (Antunez-Sanchez et al., 2020; Ito et al.,  
41 2015; Papareddy et al., 2020; Saze and Kakutani, 2011; Williams et al., 2015; Zhang et al.,  
42 2020). However, little is known about the mechanisms of epigenome homeostasis during  
43 embryogenesis when organisms are particularly vulnerable to TE-induced mutagenesis, as well  
44 as the establishment of potentially deleterious epimutations that can persist through many cell  
45 divisions and even across generations (Henderson and Jacobsen, 2007; Mathieu et al., 2007;  
46 Probst et al., 2009; Saze et al., 2003; Scheid et al., 1998).

47 In *Arabidopsis thaliana* (Arabidopsis), most TEs are found in pericentromeric regions of the  
48 genome to which RNA polymerases have limited access (Arabidopsis Genome Initiative, 2000;  
49 Lippman et al., 2004; 2000; Zhang et al., 2006). These TE-enriched constitutive  
50 heterochromatic regions are characterized by high densities of cytosine methylation in  
51 symmetric (CG or CHG;  $H \neq G$ ) and asymmetric (CHH) contexts, as well as histone H3 lysine  
52 dimethylation (H3K9me<sub>2</sub>) and other transcriptionally repressive chromatin marks (Cokus et al.,  
53 2008; Lister et al., 2008; Stroud et al., 2014). Symmetric DNA methylation and H3K9me<sub>2</sub> also  
54 facilitate the stable propagation of silenced states through cell divisions (Jackson et al., 2002;  
55 Lindroth et al., 2001; Stroud et al., 2013, 2014). METHYLTRANSFERASE 1 (MET1) maintains  
56 CG methylation through mitotic and meiotic cell divisions with high fidelity due to VARIANT IN  
57 METHYLATION 1/2/3 (VIM1/2/3) proteins that recognize hemi-methylated CG and recruit MET1  
58 to methylate daughter strands (Feng et al., 2010; Finnegan and Dennis, 1993; Ning et al., 2020;  
59 Woo et al., 2008). CG methylation can also recruit RNA Polymerase IV complexes required to  
60 produce 24-nt small interfering RNAs (siRNAs) that are then loaded onto ARGONAUTE proteins  
61 and guide them to target loci by base-pairing with nucleic acids (Blevins et al., 2015; Herr et al.,  
62 2005; Papareddy et al., 2020; Zhai et al., 2015; Zilberman et al., 2003). This leads to the  
63 recruitment of DOMAINS REARRANGED METHYLTRANSFERASES 1/2 (DRM1/2) and results  
64 in de novo methylation of cytosines in all sequence contexts, including CHH, which is a hallmark  
65 feature of RNA-directed DNA methylation (RdDM) (Cao and Jacobsen, 2002; Stroud et al.,  
66 2013; Wierzbicki et al., 2008). However, RdDM is typically restricted from constitutive  
67 heterochromatin because it is inaccessible to DNA-dependent RNA polymerase IV and

68 methyltransferases required for RdDM (Papareddy et al., 2020; Zemach et al., 2013). Instead,  
69 CHH methylation of constitutive heterochromatin is mediated by CHROMOMETHYLASE 2  
70 (CMT2) that binds to H3K9me2 deposited by KRYPTONITE (KYP) and closely related  
71 SUPPRESSOR OF ~~VARIATION~~VARIEGATION 3-9 HOMOLOGUE PROTEIN 5/6 (SUVH5/6)  
72 methyltransferases (Stroud et al., 2014; Zemach et al., 2013). CHROMOMETHYLASE 3  
73 (CMT3) also forms interlocking positive feedback loops with H3K9 methyltransferases (Du et al.,  
74 2012; Jackson et al., 2002; Lindroth et al., 2001), but is more closely associated with the cell  
75 cycle and mediates CHG methylation (Ning et al., 2020).

76 CMT3-mediated CHG methylation is largely deposited on TEs. However, CMT3 can also  
77 induce the ectopic methylation of protein-coding genes (Wendte et al., 2019). Moreover, the  
78 introduction of Arabidopsis CMT3 transgenes into *Eutrema salsugineum*, which lost CMT3  
79 millions of years ago (Bewick et al., 2016), could occasionally reconstitute CG methylation on  
80 genes (Wendte et al., 2019). The resulting gene-body methylation (gbM) could be stably  
81 maintained independent of the CMT3 transgene for several generations (Wendte et al., 2019).  
82 However, it remains largely unknown how CMT3 is restricted to targeting heterochromatin, as  
83 well as the consequences of CMT3-induced hypermethylation of genes. Moreover, the  
84 functional significance of gbM in animals and plants has been intensely debated. Because  
85 methylated cytosines are mutagenic due to associated cytosine deamination (Shen et al., 1992;  
86 Sved and Bird, 1990), features associated with gbM have been interpreted as evidence that  
87 gbM provides selective advantages that counterbalance this mutagenesis-imposed fitness  
88 penalty. For instance, gbM is depleted from transcription start and end sites (Tran et al., 2005;  
89 Zhang et al., 2006; Zilberman et al., 2007), and it has recently been reported that gbM helps  
90 prevent transcription initiation from cryptic promoters located in gene bodies as initially  
91 proposed (Choi et al., 2019; Zilberman et al., 2007). Moreover, gbM tends to be enriched on  
92 constitutively expressed genes (Lister et al., 2008; Niederhuth et al., 2016; Takuno et al., 2017;  
93 Zhang et al., 2006), which would be consistent with gbM stabilizing gene expression by  
94 excluding certain histone variants (i.e H2A.Z) from genes (Coleman-Derr and Zilberman, 2012)  
95 and generally enhancing gene expression (Muyle and Gaut, 2019; Shahzad et al., 2021).  
96 Nevertheless, accumulating evidence is also consistent with gbM being a heritable by-product of  
97 CMT3-induced epimutations (Bewick et al., 2016, 2019; Wendte et al., 2019).

98 Consistent with the need to fine-tune the amount of CMT3 activities required to both silence  
99 TEs and prevent epimutations on genes, mechanisms exist that transcriptionally (Ning et al.,  
100 2020) and post-translationally (Deng et al., 2016) regulate CMT3, as well as remove H3K9me2

101 specifically from expressed genes (Inagaki et al., 2010; Saze et al., 2008). These and additional  
102 mechanisms are likely of utmost importance during embryo development when a proliferative  
103 morphogenesis phase produces the most fundamental cell lineages of the plant, including those  
104 that will eventually generate the gametes. Yet, how DNA methylation pathways are regulated  
105 during this phase of dynamic cell division to exquisitely balance the need for TE methylation  
106 with the prevention of potentially deleterious and stably inherited epimutations is virtually  
107 unknown.

## 108 **ResultsRESULTS**

109

### 110 **Cell division is linked with CG and CHG methylation through distinct mechanisms**

111 MET1 and VIM1/2/3 are required for the faithful transmission of mCG across cell cycles (Feng  
112 et al., 2010; Finnegan and Dennis, 1993; Ning et al., 2020; Woo et al., 2008) and accordingly  
113 had increased transcript levels in rapidly dividing early embryos that also correlated well with  
114 transcripts encoding cell-cycle activators throughout embryogenesis (Figure- 1A) (Hofmann et  
115 al., 2019; Papareddy et al., 2020). More specifically, MET1 and VIM1/2/3 transcript levels  
116 peaked at the early heart stage and were reduced afterwards before plummeting at the mature  
117 green stage. These transcript developmental dynamics were also characteristic of transcripts  
118 encoding proteins involved in licensing DNA replication (e.g. Cyclins A2/B1, CDKB1-1,  
119 MINICHROMOSOME MAINTENANCE2), heterochromatin maintenance (e.g. DDM1) and DNA  
120 methylation (e.g. CMT3), but not randomized controls (Figures. 1B, Figure 1-figure supplement,  
121 S 1A). Therefore, genes required for DNA methylation and heterochromatin maintenance are  
122 tightly correlated with cell-cycle activity during embryogenesis.

123 To test whether the patterns observed for transcripts regulating DNA methylation reflect DNA  
124 methylation dynamics, we computed differentially methylated cytosines (DMCs) across flowers,  
125 embryos and leaves (see Methods). Similar to previous observations (Bouyer et al., 2017; Lin et  
126 al., 2017; Papareddy et al., 2020), 70% of DMCs occurred in the CHH context (Figure- 1C).  
127 Consistent with dynamic expression patterns of MET1 and CMT3, substantial fractions of DMCs  
128 respectively occurred in CG (20%) or CHG (10%) contexts. Therefore, DNA methylation is  
129 dynamically reconfigured in all sequence contexts during embryogenesis. In total, these  
130 symmetric DMCs represented 1,185 CG (Supplementary File Table S1) and 1,398 CHG  
131 (Supplementary File Table S2) differentially methylated regions (DMRs) covering 201 kb and  
132 185.8 kb, respectively (Figure- 1D, Supplementary File Table S4; see Methods). Although a  
133 significant fraction of CG and CHG DMRs overlapped (n = 183; 7.1% of total), the vast majority  
134 of CG and CHG DMRs were located in non-overlapping genomic regions corresponding to  
135 euchromatic gene-rich and heterochromatic TE-rich regions of the genome, respectively  
136 (Figure- 1D). Because CHG methylation can require CG methylation (Stroud et al., 2013), we  
137 tested whether the 15.1% of CHG DMRs overlapping CG DMRs require CG methylation.  
138 Leaves deficient in CG methylation did not have reduced CHG methylation in CHG DMRs  
139 regardless of whether or not they overlapped with CG DMRs (Figure 2-figure supplement 2B-  
140 S2B; data from Stroud et al. 2013). This indicates that CHG DMRs occur in distinct genomic  
141 regions and are largely independent of CG methylation (Figure- 1E,F).

Relative to floral bud samples, CG DMRs have slightly reduced methylation in preglobular embryos, followed by increased methylation until after the torpedo stage, when levels dramatically reduce in mature green embryos and recover in leaves (Figure 1G). By contrast, methylation levels of CHG DMRs are relatively stable between floral buds and early embryos, then decrease in late embryos, reaching a minimum in leaves (Figure 1H). Accordingly, changes in CG and CHG DMR methylation levels during development were significantly correlated with MET1 (Pearson's  $R = 0.8$ ;  $P$  value = 0.03) and CMT3 (Pearson's  $R = 0.74$ ;  $P$  value = 0.05) transcript levels, respectively (Figure 1-figures supplement S1B,C). Therefore, although cell division rates are correlated with symmetric DNA methylation dynamics, distinct mechanisms reconfigure CG or CHG methylation genome-wide during embryogenesis.

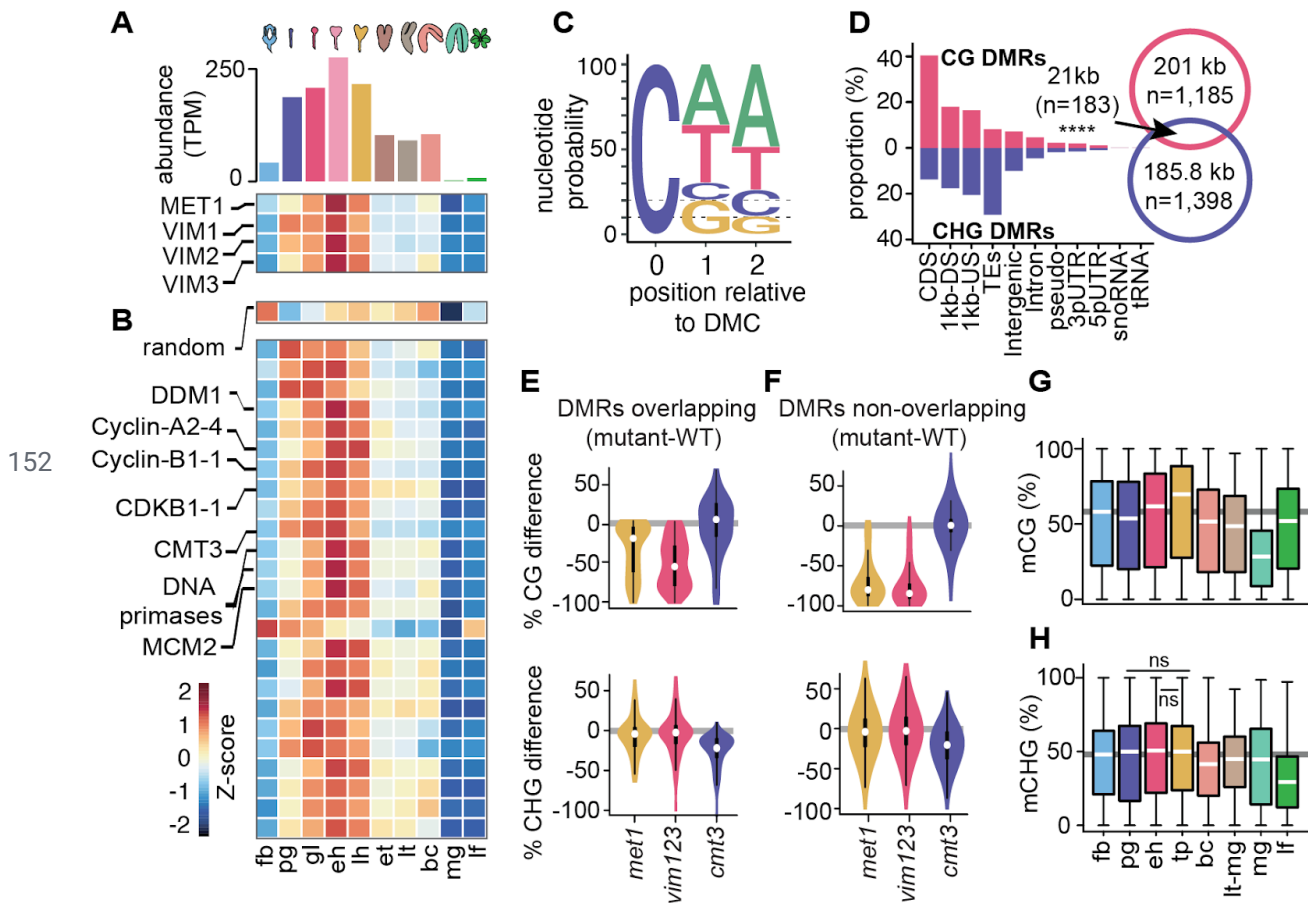

**Figure 1. Cell division is linked with CG and CHG methylation through distinct mechanisms.**

**A**) Bar chart depicting total abundance (top) and heatmap of individual relative transcript levels (bottom) of genes involved in CG methylation in three biological replicates each of flowers, embryos and leaves (Hofmann et al. 2019). fb, floral buds; pg, preglobular; gl, globular; eh, early heart; lh, late heart; et, early torpedo; lt, late torpedo; bc, bent cotyledon; mg, mature green; lf, leaf. **B**) Heatmap showing developmental dynamics of permuted gene set (top) median values (i.e. 1000 iterations of random sampling of 25 genes) and top-25 genes co-varying with MET1,

159 VIM1, VIM2 and VIM3 obtained by employing nearest neighbour algorithm calculated based on Euclidean distance  
160 between genes and centroid expression of MET1, VIM1, VIM2 and VIM3 (*bottom*). **C**) Sequence logo representing  
161 nucleotide probability relative to differentially methylated cytosines (DMC). **D**) Proportion of CG and CHG  
162 differentially methylated regions (DMRs) overlapping genomic features. Venn diagram showing overlap between  
163 CG and CHG DMRs. Significance overlap of DMRs determined by Fisher's Exact test  $P$  value  $< 0.0001$  is indicated  
164 by \*\*\*\*. **E** and **F**) Violin plot showing CG (*top*) and CHG (*bottom*) methylation differences between mutant and  
165 ~~WT~~ wild-type leaves for CHG DMRs overlapping (**E**) or not overlapping (**F**) with CG DMRs (Stroud et al., 2013). **G**  
166 and **H**) Box plots of average weighted methylation of CG DMRs ( $n = 1,185$ ) and **G**) CHG DMRs ( $n = 1,398$ ) during  
167 development. fb, floral buds; pg, preglobular; eh, early heart; tp, torpedo (6 DAP) (Pignatta et al., 2015); bc, bent  
168 cotyledon; lt-mg, late torpedo-to-early mature green (Hsieh et al., 2009); mg, mature green (Bouyer et al., 2017); lf,  
169 leaf. fb, pg, eh, bc and lf were from ((Bouyer et al., 2017; Hsieh et al., 2009; Papareddy et al., 2020; Pignatta et al.,  
170 2015). Unless stated as not significant (ns), all combinations are significant with  $P$  values  $< 0.001$  obtained by  
171 Mann-Whitney U test. Shaded horizontal line in the background represents the median methylation value of floral  
172 buds.

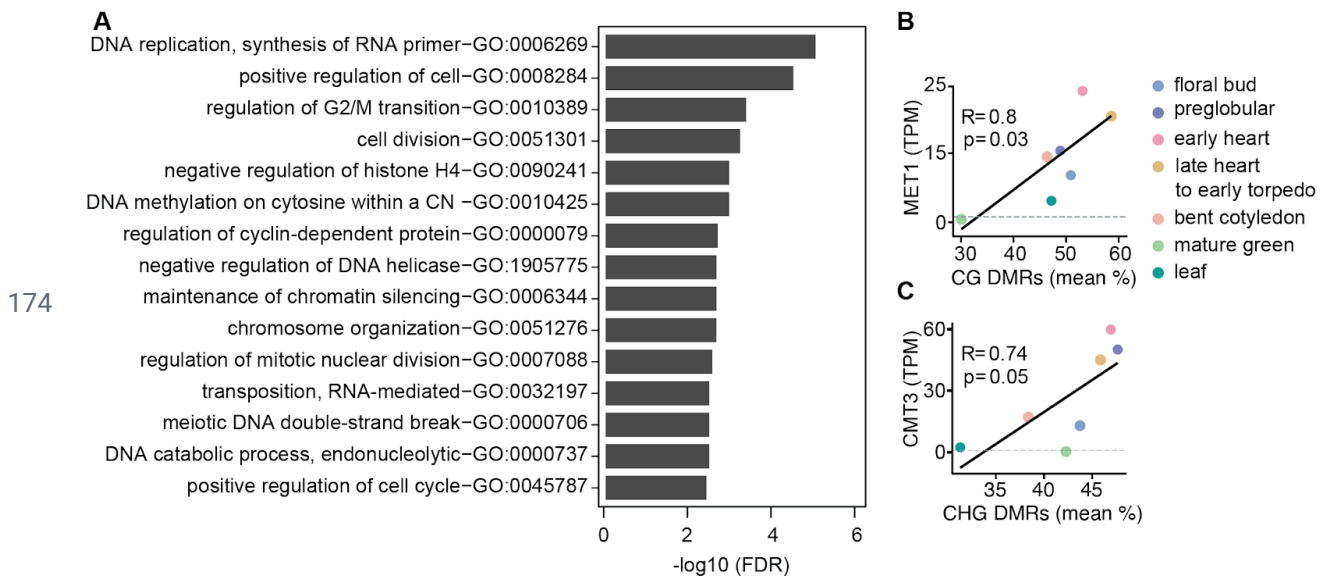

175 **Figure 1-figure supplement S1. Characteristics of genes and differentially methylated regions co-expressed**  
176 **with symmetric methyltransferases—(Related to Fig. 1).** **A**) Gene ontology enrichment of top-50 genes  
177 co-expressed with MET1 and VIM1/2/3 with false discovery rates  $< 0.05$ . **B** and **C**) Scatterplots showing Pearson's  
178  $R$  between MET1 transcript levels (TPM; transcripts per million) and mean-weighted CG methylation of  
179 developmental CG DMRs (**B**) or CMT3 TPM and mean-weighted CHG methylation of developmental CHG DMRs.  
180

## 181 Genome-wide coordination of symmetric DNA methylation

182 Because DNA methylation is concentrated on TEs (Stroud et al., 2013; Zhang et al., 2006), we  
183 next investigated global developmental dynamics of TE methylation. CG methylation on both



184 euchromatic and heterochromatic TEs was slightly reduced in pregobular embryos and then  
185 restored to the levels found in floral buds by the early heart stage (Figure 2A,B). Whereas CG  
186 methylation of euchromatic TEs was relatively constant for the remainder of embryogenesis,  
187 heterochromatic TEs had significantly increased methylation during late embryogenesis  
188 compared to post-embryonic tissues. Consistent with heterochromatin becoming highly  
189 condensed during embryo maturation (van Zanten et al., 2011), we found that CG  
190 hypermethylation in mature green compared to bent cotyledon embryos predominantly occurred  
191 in pericentromeric genomic regions rather than gene-rich chromosomal arms (Figure 2C). CG  
192 methylation was required for the production of 24-nt siRNAs from euchromatic TEs, but only  
193 marginally for heterochromatic TEs (Figure 2-figure supplement S2A, data from (Lister et al.,  
194 2008)). Conversely, the loss of 24-nt siRNAs in *nrpd1a* mutants only had negligible effects on  
195 CG methylation of both heterochromatic and euchromatic TEs (Figure 2-figure supplement S2B,C).  
196 Therefore, siRNA production from euchromatic regions of the genome requires CG  
197 methylation, but not vice versa.

198 Global CHG methylation of euchromatic and heterochromatic TEs was higher in embryos  
199 compared to leaves (Figure 2D,E). Similar to previous observations for CHH methylation  
200 (Papareddy et al., 2020), siRNA-deficient *nrpd1a* mutant tissues had reduced CHG methylation  
201 on euchromatic or heterochromatic TEs in all or only embryonic samples, respectively (Figure  
202 2F,G). Intriguingly, increased CHH methylation on heterochromatic TEs was significantly  
203 correlated with decreased CHG methylation during late stages of embryogenesis when cell  
204 division rates are reduced (Figure 2H). Therefore, CMT3-dependent CHG and  
205 CMT2-dependent CHH methylation of heterochromatic TEs are respectively positively and  
206 negatively correlated with cell division rates.

207

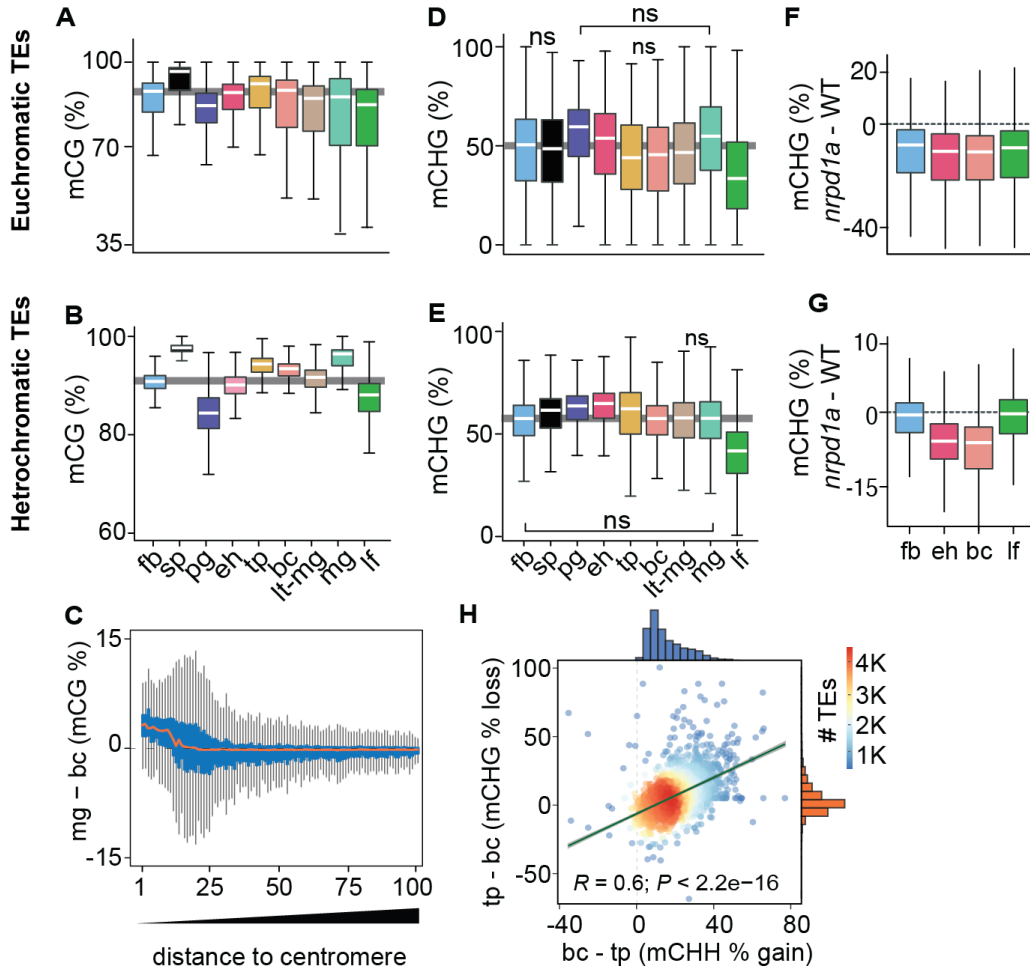

208 **Figure 2. Genome-wide coordination of symmetric DNA methylation.**

209 **A** and **B**) Boxplots of CG methylation percentages on euchromatic (**A**) and heterochromatic (**B**) TEs during  
 210 development. fb, floral buds; sp, sperm (Ibarra et al., 2012); pg, preglobular; eh, early heart; tp, torpedo (6 DAP); bc,  
 211 bent cotyledon; lt-mg, late torpedo-to-early mature green; mg, mature green; lf, leaf. Thick horizontal bars indicate  
 212 medians, and the top and bottom edges of boxes represent the 75th and 25th percentiles, respectively. Shaded  
 213 horizontal line in the background represents the median methylation value of floral buds. **C**) Difference in CG  
 214 methylation between mature green (mg) and bent cotyledon (bc) embryos were calculated in 1-kb genomic bins,  
 215 which were divided into percentiles and sorted based on their distance to centromeres (1 and 100 being the tile  
 216 closest and furthest from centromeres, respectively). Red color line indicates the median and the top and bottom  
 217 edges of the blue colored boxes represent 75th and 25th percentiles, respectively. Vertical grey bars indicate 1.5X  
 218 the interquartile range. **D** and **E**) Boxplots of CHG methylation on euchromatic (**D**) and heterochromatic (**E**) TEs  
 219 during development (key as in **A**). **F** and **G**) Boxplots of CHG methylation differences between *nrpd1a* and **WT**  
 220 **type** (Col-0) tissues for euchromatic (**F**) and heterochromatic (**G**) TEs. **H**) Scatterplot showing Pearson's correlation  
 221 coefficients ( $R$ ). Differences in mCHH and mCHG between bent cotyledon (bc) and torpedo stage (tp) embryos are  
 222 shown on x- and y-axes, respectively. Histograms show the number of TEs in thousands (K).

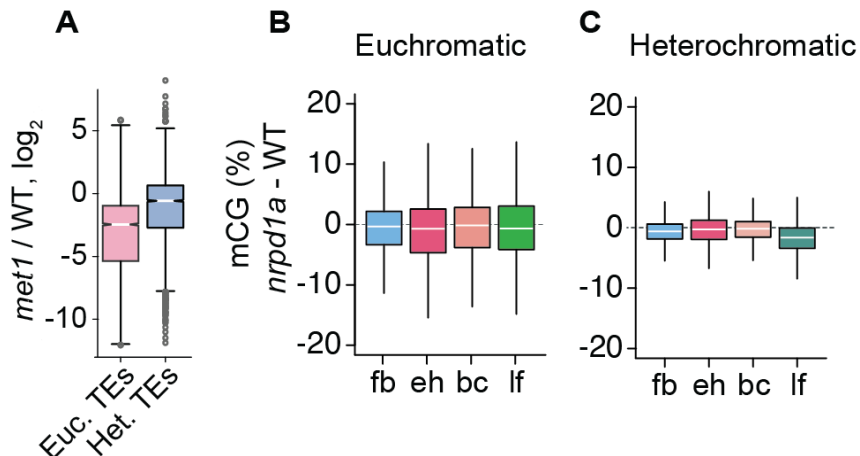

**Figure S2-figure supplement 1. Relationships between MET1 and 24-nt siRNAs (Related to Fig. 2).** **A)** Boxplot illustrating relative levels of 24-nt siRNAs in *met1* relative to wild-type (WT) (Lister et al., 2008); Euchromatic and heterochromatic TEs are abbreviated as Euc. TEs and Het. TEs, respectively. **B** and **C)** Boxplots of CG methylation differences between *nprdl1a* and wild-type tissues for euchromatic (**B**) and heterochromatic (**C**) TEs. fb, floral buds; eh, early heart; bc, bent cotyledon; lf, leaf. Thick horizontal bars indicate medians, and the top and bottom edges of boxes indicate the 75th and 25th percentiles, respectively.

## Repression of CMT3 during embryogenesis regulates methylome dynamics

CMT3 is recruited to loci by binding to H3K9me2 deposited by SUVH4/5/6 histone methyltransferases (Du et al., 2012; Jackson et al., 2002; Lindroth et al., 2001; Stroud et al., 2014). CMT3 and KYP, which is the major SUVH4 H3K9 methyltransferase, were dynamically expressed according to patterns characteristic of other cell-cycle regulated genes and CHG methylation dynamics (Figures. 1A,H, Figure 3A). More specifically, CMT3 and KYP were highly expressed in rapidly dividing early embryos and had reduced expression in late embryos until the mature stage, where they were barely detectable. Altogether, our results are consistent with the idea that the more rapid cell divisions in early embryos demand higher levels of CMT3 and KYP to maintain mCHG through the cell cycle. Moreover, IBM1, which encodes an H3K9me2 demethylase and prevents CMT3 recruitment to gene bodies (Miura et al., 2009; Saze et al., 2008), is dynamically expressed during embryogenesis in a pattern that strongly resembles CMT3 and KYP (Figure- 3A). Therefore, co-expression of IBM1 with CMT3 and KYP likely helps limit ectopic H3K9me2 and methylated CHG on gene bodies during embryogenesis as has been demonstrated during post-embryonic development (Inagaki et al., 2017).

We previously found that miR823-directed cleavage of CMT3 transcripts is highly enriched in embryos directly after morphogenesis (Plotnikova et al., 2019). In contrast to CMT3 transcript

248 dynamics, miR823 accumulates during embryogenesis, and miR823:CMT3 cleavage products  
249 were enriched and significantly detected specifically at late heart and early torpedo stages  
250 precisely when CMT3 transcript levels were sharply decreasing (Figure 3B). Based on these  
251 observations, we hypothesized that miR823-mediated repression of CMT3 contributes to the  
252 reduced CHG methylation levels observed during late embryogenesis.

253 To test if miR823-directed repression of CMT3 transcripts reduces CHG methylation levels  
254 during embryogenesis, we generated deletions in the region of the *MIR823* locus encoding the  
255 mature miRNA (Figure 3-figure supplement 1-S3A) and examined CMT3 transcript and CHG  
256 methylation levels. Both independently generated *mir823-1* and *mir823-2* mutants were  
257 confirmed as nulls (Figure 3-figure supplement 1B-S3B) and had significantly increased CMT3  
258 levels relative to wild type (WT) in embryos at the bent cotyledon stage when embryos at which  
259 stage CMT3 levels are normally reduced (Figure 3C). Consistent with miR823-directed  
260 cleavage of CMT3 being highly enriched in embryos, we did not observe increased CMT3  
261 transcripts in either leaves or floral buds of *mir823* mutants (Figure 3-figure supplement 1-S3D).  
262 Moreover, CHG, but not CG or CHH, methylation was increased on TEs in bent cotyledon  
263 embryos of both *mir823-1* and *mir823-2* mutants relative to WT wild-type (Figures 3D, Figure  
264 3-supplemental figure 1-S3E).

265 As an independent approach, we used site-directed mutagenesis to introduce synonymous  
266 mutations in the miR823 target site within CMT3 transgene constructs that included 1.41 kb  
267 upstream and 0.73 kb downstream intergenic regions, and associated cis-regulatory elements  
268 (Figure 3-figure supplement 1C-S3C; see Methods). As controls, we also generated CMT3  
269 constructs without mutations, and introduced these miR823-cleavable CMT3 (cCMT3), as well  
270 as the miR823-resistant (rCMT3), constructs into *cmt3-11* mutant plants (Henderson and  
271 Jacobsen, 2008). CMT3 transcript levels were increased in rCMT3 relative to cCMT3 lines at  
272 the bent cotyledon stage (Figure 3C), but not in leaves or floral buds (Figure 3-figure  
273 supplement 1-S3D), which further indicates that miR823-directed cleavage and repression of  
274 CMT3 is highly enriched in embryos transitioning between morphogenesis and maturation.  
275 CMT3 levels were also increased in cCMT3 and rCMT3 lines compared to Col-0 in embryos,  
276 leaves and floral buds (Figures 3C, Figure 3-figure supplement 1-S3D) suggesting that miR823  
277 is not sufficient to repress transgenic CMT3 to the same extent as endogenous CMT3  
278 transcripts. Although we cannot rule out that this is due to missing cis-regulatory repressive  
279 elements in the transgenes, increased gene dosage and positional effects of the transgenes  
280 seems more likely. Upstream and downstream intergenic regions were included in the CMT3  
281 constructs (Figure 3-figure supplement 1-S3G). Moreover, although relative transgene copy

282 numbers were not significantly different across the independently generated cCMT3 and rCMT3  
283 transgenic lines, they were higher than endogenous CMT3 in ~~WT~~wild-type (Figure 4-figure  
284 supplement 1-S4G,H). Nevertheless, it is clear that CMT3 levels are finely tuned during  
285 embryogenesis. Together with the analysis of *mir823* mutants and miR823-mediated CMT3  
286 transcript cleavage products (Plotnikova et al., 2019), these results strongly indicate that  
287 miR823 cleaves and represses CMT3 levels during mid-embryogenesis. Consistent with what  
288 we observed in *mir823* mutants, increased CMT3 transcript levels in cCMT3 and rCMT3  
289 embryos resulted in CHG hypermethylation of TEs (Figure- 3D) but did not globally influence  
290 CG or CHH methylation (Figure-figure supplement 1-S3E,F). Remarkably, increased CMT3  
291 transcript levels in *mir823* mutants, cCMT3 and most strikingly rCMT3 embryos were associated  
292 with ectopic CHG methylation on protein-coding gene bodies and flanking regions in bent  
293 cotyledon embryos (Figure- 3E). Therefore, both TEs and genes are hypermethylated when  
294 CMT3 levels are not properly down-regulated upon the morphogenesis-to-maturation transition  
295 during embryogenesis.

296 To test whether miR823-directed repression of CMT3 and prevention of CHG methylation of  
297 genes that we observed in embryos persists after embryogenesis, we next profiled methylomes  
298 of cCMT3 and rCMT3 plants three weeks after germination. We chose to focus on rCMT3 plants  
299 because of the large amount of hypermethylation observed in these lines during  
300 embryogenesis, and used cCMT3 plants as controls. Although TEs had increased CHG  
301 methylation levels in both cCMT3 lines relative to ~~WT~~wild-type, protein-coding genes were not  
302 affected (Figure- 3F,G). In stark contrast, TEs and genes were hypermethylated in both rCMT3  
303 lines compared to cCMT3 or ~~WT~~wild-type plants, and only slightly reduced relative to the levels  
304 observed in rCMT3 bent cotyledon embryos (Figure- 3F,G). Together with miR823-independent  
305 processes (e.g. IBM1 removal of H3K9me2), miR823-directed repression of CMT3 is therefore  
306 required to prevent the hypermethylation of protein-coding genes that can be maintained weeks  
307 after the completion of embryogenesis.

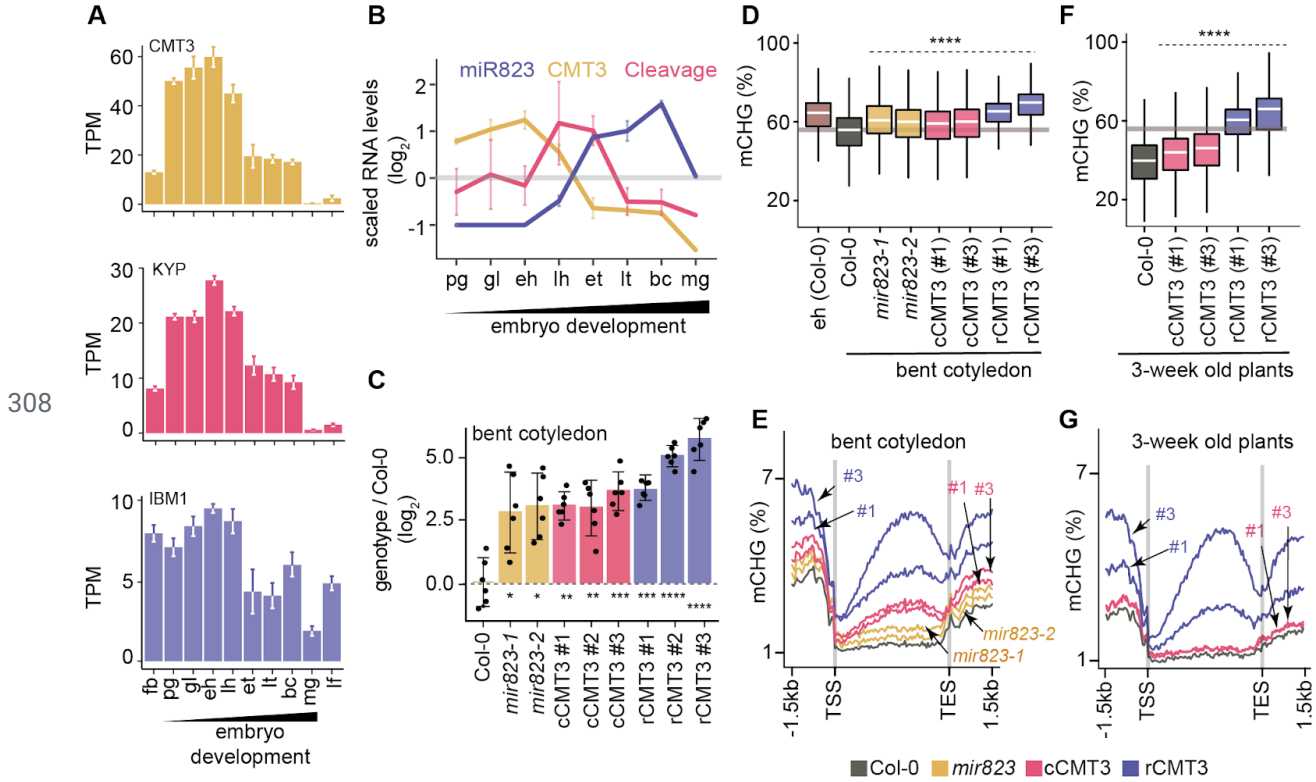

**Figure 3. Repression of CMT3 during embryogenesis regulates methylome dynamics.** A) Barplots illustrating transcript levels of CMT3 (top), KYP (middle) and IBM1 (bottom) in flowers, embryos and leaves. fb, floral buds; pg, preglobular; gl, globular; eh, early heart; lh, late heart; et, early torpedo; lt, late torpedo; bc, bent cotyledon; mg, mature green; lf, leaf. Error bars represent standard errors of the means of three biological replicates. B) Line graphs showing the relative RNA abundance of miR823 (blue), CMT3 RNA (yellow) and miR823:CMT3 cleavage products (pink). C) Log<sub>2</sub>-transformed relative CMT3 target transcript levels in bent cotyledon embryos (8 DAP; day after pollination) from *WT* wild-type plants (Col-0), or *cmt3-11* plants expressing either miR823-cleavable CMT3 (cCMT3) or miR823-resistant CMT3 (rCMT3) versions. Each dot represents the mean of two technical replicates of embryos and bars represent mean values. E and error bars in A-C represent indicate standard errors of the means of three biological replicates. Asterisks indicate whether the transcript levels observed in *mir823* mutant, cCMT3 and rCMT3 embryos were significantly different compared to *WT* wild-type (Two-tailed Student's t tests; \*\*\*\*, \*\*\*, \*\*, and \* represent *P* values < 0.0001, < 0.001, < 0.01, and < 0.05, respectively). Color-coded according to the key. D) Boxplots of CHG methylation on transposons with ≥5 informative cytosines covered by ≥4 reads and classified as either euchromatic or heterochromatic in Papareddy et al. 2020. *P* values < 0.0001 based on Mann-Whitney U tests of methylation differences between *WT* wild-type and either mutant or transgenic bent cotyledon embryos are represented by \*\*\*\*. E) Metaplots of average CHG methylation percentages across gene bodies from transcription start sites (TSS) to transcription end sites (TES), 1.5-kb upstream and 1.5-kb downstream of genes in bent cotyledon embryos. Color-coded according to the key. F and G) Boxplots of CHG methylation on transposons (F) and metaplots of CHG methylation on genes (G) in three-week old plants as described in D and E, respectively.



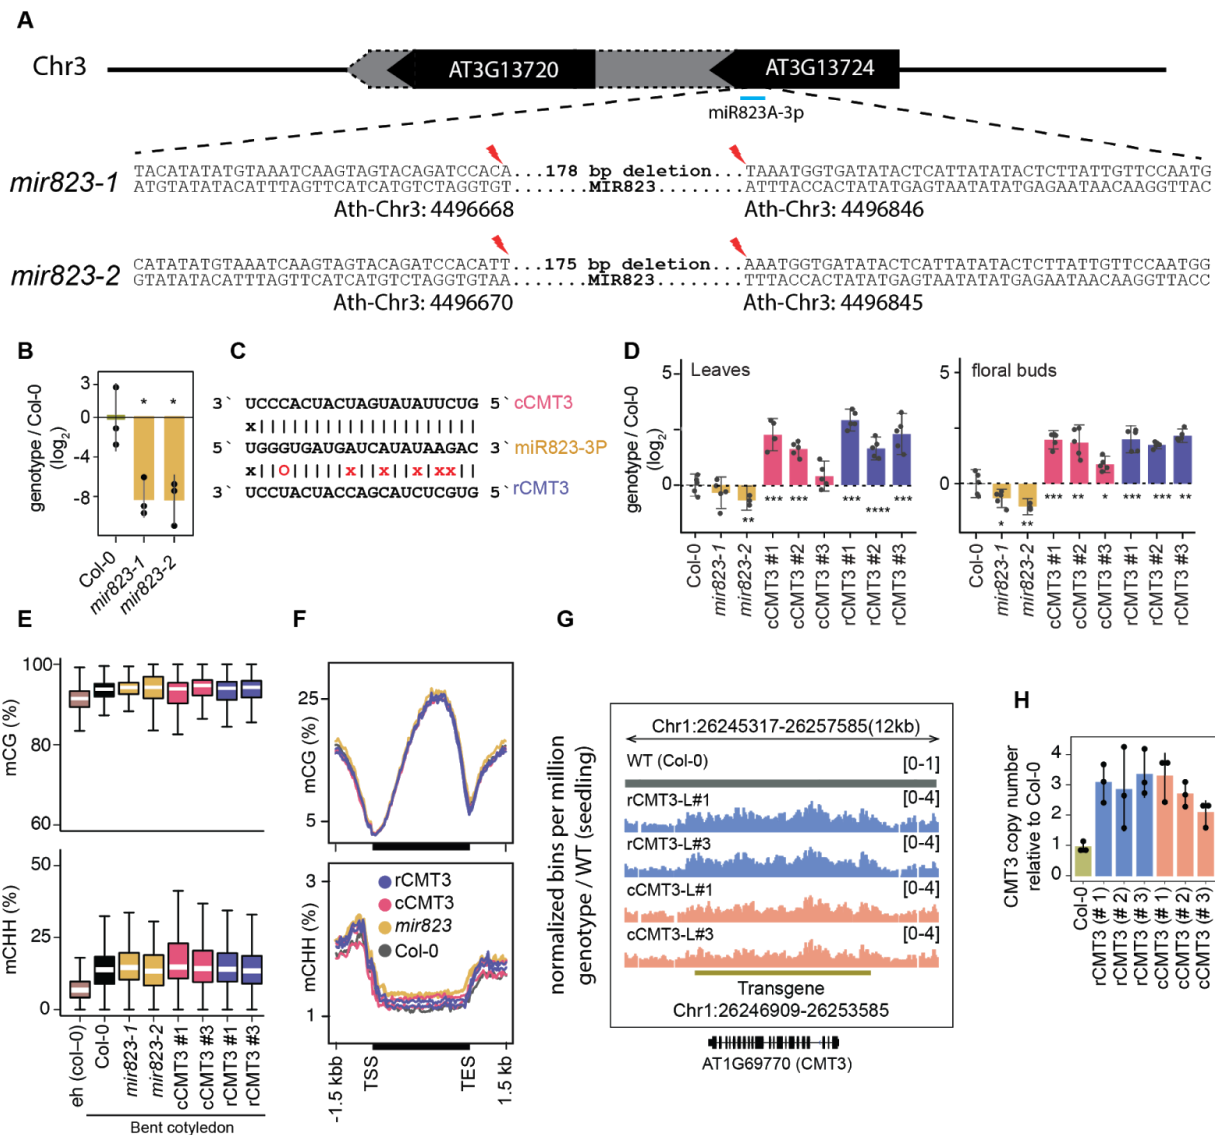

330 **Figure 3-figure supplement 1** **Figure S3. *mir823* mutants and effects of miR823-directed repression of CMT3**

331 (Related to Fig. 3). **A**) Diagram of sequences deleted by CRISPR/Cas9 approach from MIR823A locus in *mir823-1*

332 and *mir823-2*. **B**) Relative levels of miR823 in **WT** wild-type (Col-0), *mir823-1* and *mir823-2* bent cotyledon

333 embryos (~8 DAP; days after pollination). Stem-loop qPCR values were normalized to U6 and then divided by the

334 levels observed in wild-type plants before log<sub>2</sub>-transformation. Each dot represents the mean of two technical

335 replicates of embryos, and error bars indicate standard error. *P* values < 0.01 based on two-tailed Student's t-test of

336 differences between **WT** wild-type and *mir823* mutants are represented by \*.

337 **C**) Schematics of miR823 target site in CMT3 transcripts. Base-pairing interactions of miR823 with either wild-type target sites (cleavable, cCMT3) or

338 miRNA-resistant target sites (resistant, rCMT3) are indicated above and below, respectively. Mutations introduced

339 are labeled in red, and Watson-Crick base-pairing (I), non-base-pairing (X), and G:U wobbles (O) for each pair are

340 indicated. **D**) Relative CMT3 transcript levels in two-week old leaves (*left*) or floral buds (*right*) from **WT** wild-type

plants (Col-0), *mir823-1*, *mir823-2*, or *cmt3-11* plants carrying either miR823-cleavable CMT3 (cCMT3) or miR823-resistant CMT3 (rCMT3) transgenes. Bars represent mean values and error bars indicate standard errors. Asterisks indicate whether the transcript levels observed in *mir823* mutants, or cCMT3 and rCMT3 transgenics were significantly different compared to *WT* wild-type (Two-tailed Student's t-tests; \*\*\*\*, \*\*\*, \*\*, and \* represent  $P$  values  $< 0.0001$ ,  $< 0.001$ ,  $< 0.01$ , and  $< 0.05$ , respectively). **E**) Boxplots of CG (*top*) and CHH (*bottom*) methylation on euchromatic and heterochromatic transposons with  $\geq 4$  informative cytosines covered by  $\geq 5$  reads. **F**) Metaplots of average CG (*top*) and CHH (*bottom*) methylation percentages across genes bodies, and 1.5 kb upstream and downstream regions. Genotypes are color-coded according to the key. **G**) Integrative Genomics Viewer screenshot of CMT3 locus showing normalized coverage of methylC-seq reads compared to *WT* wild-type (see Methods). **H**) CMT3 copy number quantification based on qPCR in three-week old leaves from *WT* wild-type (Col-0), or independently generated rCMT3 or cCMT3 transgenics in the *cmt3-11* background.

### Chromatin features associated with CMT3-induced gene methylation

To yield insights into how genes are hypermethylated upon the derepression of CMT3, we determined whether certain genomic features were associated with CMT3-induced genic methylation. Towards this end, we first selected 22,637 nuclear-encoded protein-coding genes that had  $\geq 5$  methylC-seq reads overlapping CHG sites in rCMT3 line #3 and that were expressed (i.e.  $\geq 1$  TPM in any tissue based on (Hofmann et al., 2019)). We chose rCMT3 line #3 because it had the strongest genome-wide CHG hypermethylation and focussed on expressed genes to exclude those that may have TE-like features, which could confound analysis. We then used k-means clustering of the differences between rCMT3 line #3 and *WT* wild-type bent cotyledon embryos to partition this set of genes into four clusters (Figure 4-figure supplement 1-S4A). These clusters were comprised of 1,439 to 7,882 genes (6.4% to 34.8% of total) and ranged from groups of genes that had no methylation changes (cluster 1) to those that were strongly hypermethylated with 3' biases (cluster 4) in rCMT3 compared to *WT* wild-type embryos (Figure 4-figure supplement 1-S4B,C). The same patterns were observed across these clusters in embryos from an independently generated rCMT3 transgenic (line #1), which indicates that CMT3-induced hypermethylation is not stochastic (Figure 4-figure supplement 1-S4B,C).

TE-like methylated (teM) genes generally have non-CG methylation on their gene bodies without strong 3' biases (Kawakatsu et al. 2016; Bewick et al. 2016). To check whether rCMT3 induced genic CHG methylation is affected by teMs, we intersected our gene clusters with previously defined teMs (Bewick et al. 2016) and found that only 272 of 22,637 (0.012%) expressed genes overlapped teMs (Figure 4-figure supplement 1D). Hypermethylated clusters (cluster 3 and 4) contained more teMs compared to unmethylated or lowly methylated gene



376 clusters (Figure 4-figure supplement 1E). However, rCMT3 embryos still had genic CHG  
 377 hypermethylation and 3' biases after excluding teM genes; whereas, WT embryos remained  
 378 devoid of CHG methylation (Figure 4-figure supplement 1F,G). Therefore, our analysis is not  
 379 confounded by either TEs or teM genes. As expected, CMT3-induced hypermethylation  
 380 predominantly occurred in the CMT3-preferred CWG context (Gouil and Baulcombe, 2016; Li et  
 381 al., 2018) although hypermethylation was also found in CCG and slightly, but significantly in  
 382 non-CHG contexts, including CG characteristic of gbM similar to previous observations (Figure  
 383 4-figure supplement 1H) (Wendte et al., 2019).

384 Consistent with methyltransferases preferring nucleosome-rich DNA as substrates  
 385 (Chodavarapu et al. 2010; Du et al. 2012), CMT3-induced hypermethylation was proportional to  
 386 patterns of nucleosome occupancy and biased towards the 3' ends of gene bodies, which was  
 387 highly similar to CG methylation (Figure s-4C, Figure 4-figure supplement 1S4I-E). Nucleosome  
 388 spacing is promoted by linker histone 1 (H1) (Choi et al., 2019; Fan et al., 2003) and  
 389 CMT3-induced CHG hypermethylation was proportional to H1 levels across gene bodies (Figure  
 390 4-figure supplement 1S4J-F). Because nucleosome occupancy was not as readily  
 391 distinguishable between clusters of affected genes (i.e. clusters 2-4) (Figure 4-figure  
 392 supplement 1S4I,J,E,F), we hypothesized that histone variants conferring differential  
 393 nucleosome stabilities and chromatin accessibility may influence ectopic CMT3-induced  
 394 hypermethylation (Osakabe et al., 2018). Indeed, CHG hypermethylation across the four groups  
 395 was positively correlated with levels of the stable histone variants H2A, H2A.X and most notably  
 396 H2A.W that was recently shown to be required for CHG methylation (Figure s-4E,F, Figure  
 397 4-figure supplement 1S4K-G) (Bourguet et al., 2021; Yelagandula et al., 2014). CMT3-induced  
 398 CHG hypermethylation was also tightly associated with transcriptionally repressive H3K9me2  
 399 marks, which are required for interdependent feedback loops with CMT3 (Figure- 4G). It was  
 400 inversely related to H2A.Z (Figure- 4H) and marks indicative of active transcription including;  
 401 H3K4me3 and H3K9ac (Figures- 4I, Figure 4-figure supplement 1S4L-H). Further suggesting  
 402 that deregulated CMT3 prefers features typically associated with inaccessible chromatin, genes  
 403 with CHG hypermethylation had reduced chromatin accessibility (Figure 4-figure supplement 1-  
 404 S4M-I) and were generally closer to heterochromatic centromeres (Figure- 4-figure supplement  
 405 1S4N-J). Moreover, the most CMT3-induced hypermethylated genes (i.e. cluster 4) were also  
 406 substantially hypermethylated in *ddm1* mutants (Figure- 4J) that have increased  
 407 heterochromatic accessibility (Figure- 4K) and decreased stability (Mathieu et al., 2003; Soppe  
 408 et al., 2002; Zhong et al., 2021). Although CMT3-induced CHG hypermethylation was strongly  
 409 associated with CG gene-body methylation (gbM), both the independence of developmental

410 mCHG DMRs (Figure 1E,F) and the gain of mCHG being associated with proportional loss of  
 411 mCG over genes in *ddm1* mutants (Figure 4-figure supplement 1S4OK) (Ito et al., 2015; Stroud  
 412 et al., 2013; Zemach et al., 2013) indicate that mCG is not strictly required for ectopic CHG  
 413 hypermethylation of genes. Instead, the associations between chromatin features of genes and  
 414 their propensity for CMT3-induced hypermethylation altogether suggest that excessive CMT3 is  
 415 ectopically recruited to genic chromatin characterized by nucleosome stability and  
 416 inaccessibility.

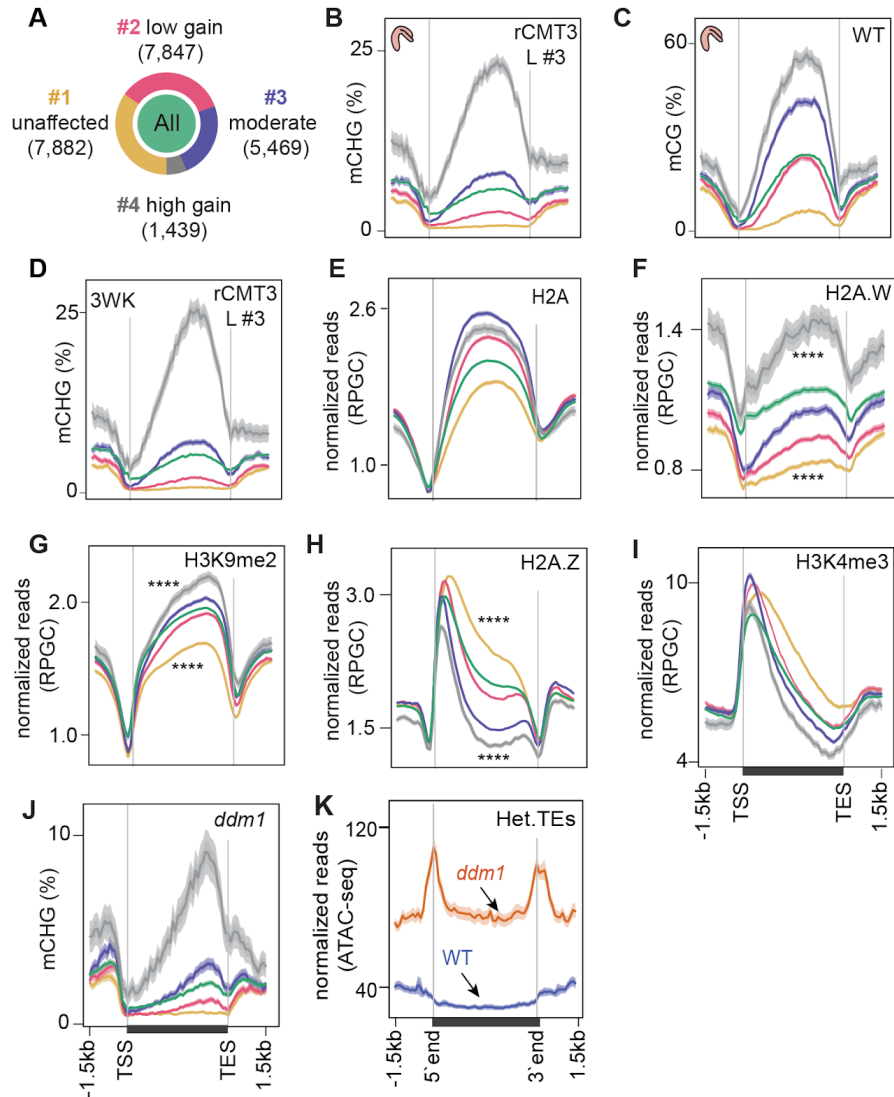

418 **Figure 4. Chromatin features associated with CMT3-induced gene methylation.** A) Proportion of genes in each  
 419 cluster partitioned using k-means clustering algorithm based on differences in mCHG between rCMT3 (line #3) and  
 420 WT wild-type embryos. Unaffected genes (yellow), low mCHG gain genes (red), moderate mCHG gain genes (blue)  
 421 and high mCHG gain genes (grey). Green inner circle represents all expressed genes. B-D) Metaplots showing  
 422 mCHG on gene clusters in bent cotyledon embryos from rCMT3 line #3 (L #3) (B), mCG on gene clusters in

423 ~~WT wild-type~~ bent cotyledon embryos (C) and mCHG in rCMT3 (L #3) three-week old plants (3WK) (D). Shaded  
424 ribbons in metaplots represent standard deviations. E-I) Metaplots showing normalized reads per genomic content  
425 (RPGC) average values of histone variant H2A (E), H2A.W (F) (Yelagandula et al., 2014), H3K9me2 (G) (Stroud et  
426 al., 2014), H2A.Z (H) (Yelagandula et al., 2014) and H3K4me2 (I) (Maher, 2020). P values < 0.0001 obtained by  
427 Mann-Whitney U test based on differences between genes in cluster 1 or 4 compared to all genes is represented by  
428 \*\*\*\*. J) Metaplots showing mCHG on gene clusters in seventh generation *ddm1* mutants (Stroud et al., 2013). K)  
429 Normalized ATAC-seq reads (Zhong et al., 2021) representing accessibility of heterochromatic TEs (Het.TEs) in  
430 WT and *ddm1* mutants as defined in Papareddy et al., 2020.

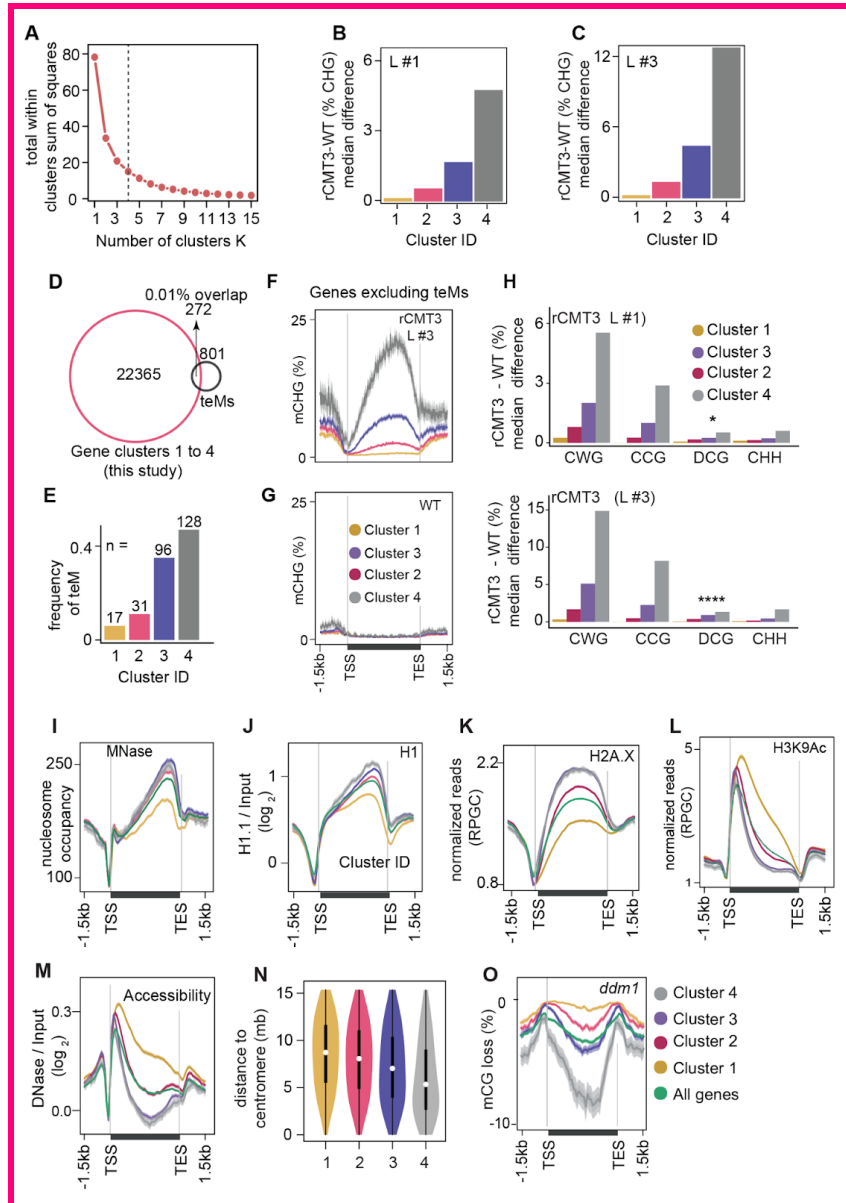

432 **Figure 4-figure supplement 1S4.** Partitioning of CMT3-induced hypermethylated genes and associated chromatin  
433 features (Related to Fig. 4). A) Determining the optimal K-value based difference in genic mCHG between rCMT3  
434 (Line #3) and wild-type bent cotyledon embryos using the elbow method. Four clusters were selected as optimal

because the total within cluster sum of squares (WSS) became marginal after a K value of four. **B** and **C**) Barplots showing median mCHG gain on annotated gene bodies in rCMT3 (Line #1) (**B**) and rCMT3 (Line #3) (**C**) compared to wild-type bent cotyledon embryos. **D**) **Overlap between expressed genes used for K-means clustering in main figure 4A and all genes classified as teM in Bewick et al 2016.** **E**) Number of total intersected teM in each gene cluster. **F-G**) Metaplot showing average weighted methylation rate in rCMT3 Line #3 (**F**) and ~~wild-type (WT)~~ (**G**) **after excluding 272 teM intersecting genes.** **H-I**) Barplots illustrating median gain of methylation in rCMT3 (Line #1) (*top*) and rCMT3 (Line #3) (*bottom*) compared to wild-type bent cotyledon embryos in various trinucleotide cytosine contexts where W = A or T and D ≠ C. *P* Values <0.05 and <0.0001 obtained by Mann Whitney U test based on difference in DCG methylation between rCMT3 and WT in bent cotyledon embryos were represented by \* and \*\*\*\* respectively. **I-ME-I**) Metaplots showing nucleosome occupancy obtained from MNase-seq data (Rutowicz et al., 2019) (**I**), enrichment of linker histone 1 (H1) on gene clusters (Choi et al.) (**J**), normalized reads per genomic content (RPGC) average value of histone variant H2A.X (Yelagandula et al., 2014) (**K**), H3K9Ac (Wang et al., 2019) (**L**) and DNase-Seq signal on gene clusters representing accessibility (Choi et al.) (**M**). **N**) Violin plot showing distances between genes and centromeres per cluster. White dots indicate the median and vertical black bars indicate 1.5X interquartile ranges. **O**) Metaplot of CG methylation in differences in *ddm1* compared to ~~wild-type (WT)~~ (Stroud et al., 2013).

451

## 452 **Impact of CMT3-induced hypermethylation on gene expression**

Because CHG methylation of TEs contributes to their repression (Stroud et al., 2014), we tested whether CMT3-induced ectopic CHG hypermethylation of protein-coding genes also represses their expression levels. Namely, we performed mRNA-seq on three biological replicates of ~~WT wild-type~~ and rCMT3 (line #s 1 and 3) bent cotyledon embryos. Principal component analysis revealed that ~~WT wild-type~~ and rCMT3 biological replicates clustered according to genotype and in similar positions along the dominant principal component axis corresponding to developmental time (Figure- 5A). This indicates that our mRNA-seq datasets captured gene expression variation inherent to ~~WT wild-type~~ and rCMT3 genotypes, as well as that our staging was accurate. Differences in global transcript levels were not observed across the four clusters with increasing levels of CMT3-induced CHG methylation suggesting that ectopic CHG methylation alone was not sufficient to globally repress gene expression (Figures- 5B, Figure 5-figure supplement 1-5A). We then identified 916 genes that were differentially expressed between rCMT3 and WT embryos (i.e. ≥2-fold differences and adj. *P* values ≤ 0.01; see Methods) (Figure 5-figure supplement 1-5B,C and Supplementary File Table-S3). Differentially expressed genes (DEGs), defined by comparing either rCMT3 line #1 or rCMT3 line #3 with ~~WT wild-type~~, were commonly detected in both independently generated lines with 87.5% of genes overlapping (Figure 5-figure supplement- 1-5C). In both rCMT3 lines, DEGs were less

470 hypermethylated compared to all expressed genes, which indicates that the vast majority of  
 471 changes in gene expression observed upon up-regulation of CMT3 ~~were~~ not directly due to  
 472 their hypermethylation (Figure 5-figure supplement 1-S5D). We then examined whether  
 473 hypermethylation affects a subset of genes by computing DMRs in rCMT3 compared to WT  
 474 bent cotyledon embryos and identified 4,603 (97% of total) and 127 (3% of total) CHG  
 475 hypermethylated and hypomethylated DMRs, respectively (Supplementary File Table S4; see  
 476 Methods). Further suggesting that CHG hypermethylation has minimal direct consequences on  
 477 the expression of most genes under the conditions examined, we found that only a small but  
 478 significant number of the down-regulated genes (including 1.5 kb regions flanking their  
 479 transcriptional units) overlapped DMRs (21 of 542, 3.8% of total; Fisher's exact test,  $P$  value =  
 480  $1.29\text{e-}05$ ) (Figure 5-figure supplement 1-S5E). Consistent with CMT3-induced hypermethylation  
 481 repressing their expression, the DMRs overlapping these 21 down-regulated genes were  
 482 significantly CHG hypermethylated compared to genomic bins (Figure- 5C). Moreover, the  
 483 stronger-expressing rCMT3 line #3 had significantly higher CHG methylation compared to  
 484 rCMT3 line #1 (Figure- 5C). This further supports that increased CMT3 levels lead to more  
 485 ectopic CHG methylation (Inagaki et al., 2010, 2017). However, the transcript levels of these 21  
 486 genes were only moderately reduced in rCMT3 line #3 compared to rCMT3 line #1, suggesting  
 487 non-linear relationships between gene hypermethylation and transcript levels (Figure 5-figure  
 488 supplement 1-S5F). Strikingly, transcripts corresponding to these 21 CMT3-induced  
 489 hypermethylated and down-regulated genes were rapidly increasing when embryos were  
 490 transitioning to the maturation phase (Figure- 5D). Moreover, 10 of these 21 genes (Fisher's  
 491 exact test,  $P$  value =  $1.49\text{e-}13$ ), were among a group of 381 genes previously identified to also  
 492 be rapidly activated at these time points (Figure 5-figure supplement 1-S5G) (Hofmann et al.,  
 493 2019). Nearly half of these 381 genes ( $n = 183$ , 48%) were also among the 563 significantly  
 494 down-regulated genes in rCMT3 embryos compared to ~~WT~~ wild-type. Altogether, our expression  
 495 and methylation analyses suggest that when CMT3 is not properly repressed it can induce  
 496 ectopic hypermethylation of genes. Furthermore, we suggest that CMT3-induced  
 497 hypermethylation of gene promoters or bodies can reduce the steady state levels of transcripts  
 498 from genes that are in the process of switching from silent to active transcriptional states.  
 499 However, additional experiments are required to directly test whether gene-body CHG  
 500 methylation can repress gene expression.

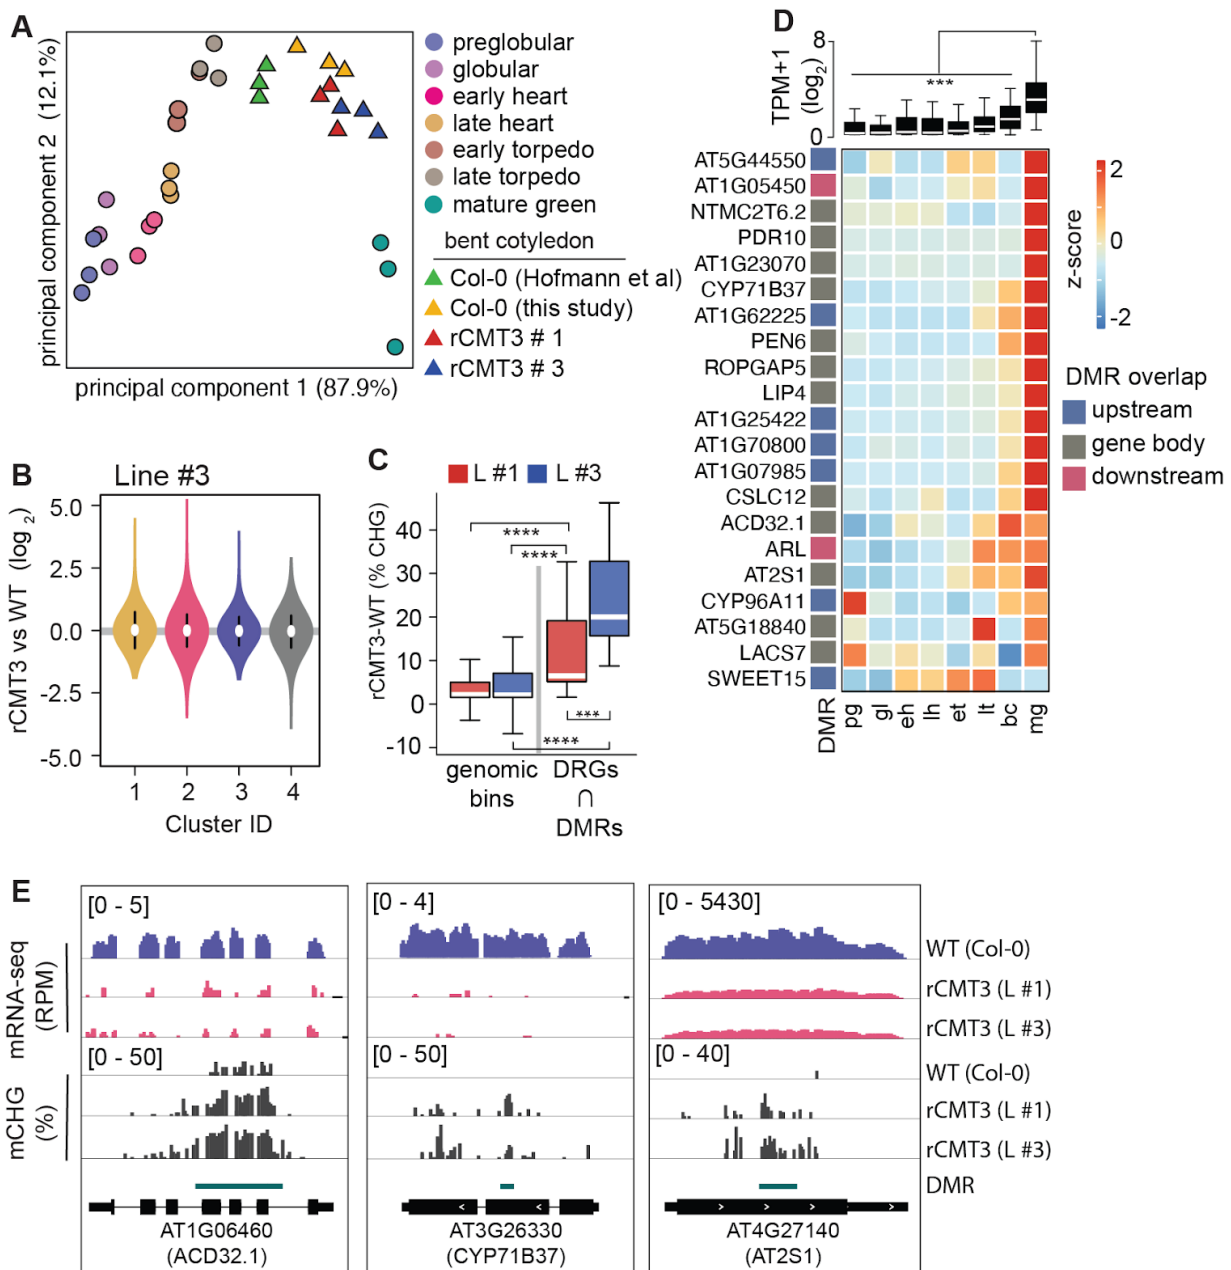

**Figure 5. Impact of CMT3-induced hypermethylation on gene expression.** **A)** Principal component analysis of mRNA-seq from three biological replicates of rCMT3 and WT wild-type (WT, Col-0) bent cotyledon embryos generated in this study along with floral buds, embryos, leaves, from (Hofmann et al., 2019) and color-coded according to the key. **B)** Violin plot showing transcript fold changes in rCMT3 (line #3) compared to WT wild-type (WT, Col-0) bent cotyledon embryos per cluster as defined in Figure 4A. **C)** Boxplot showing difference in methylation comparing rCMT3 to WT in down-regulated genes (DRG) intersecting with DMRs and similarly sized genomic bins of 213-bp as controls. *P* values < 0.001 and < 0.0001 based on Mann-Whitney U tests are represented by \*\*\* and \*\*\*\* respectively. **D)** Boxplot (top) and heatmap (bottom) of transcript levels of DRGs intersecting DMRs during embryogenesis. *P* values < 0.001 based on differences in transcript levels between mature green (mg)



and all other stages of embryogenesis based on Mann-Whitney U test are represented by \*\*\*. **E)** Integrative genome viewer (IGV) screenshot of representative down regulated genes associated with DMRs.

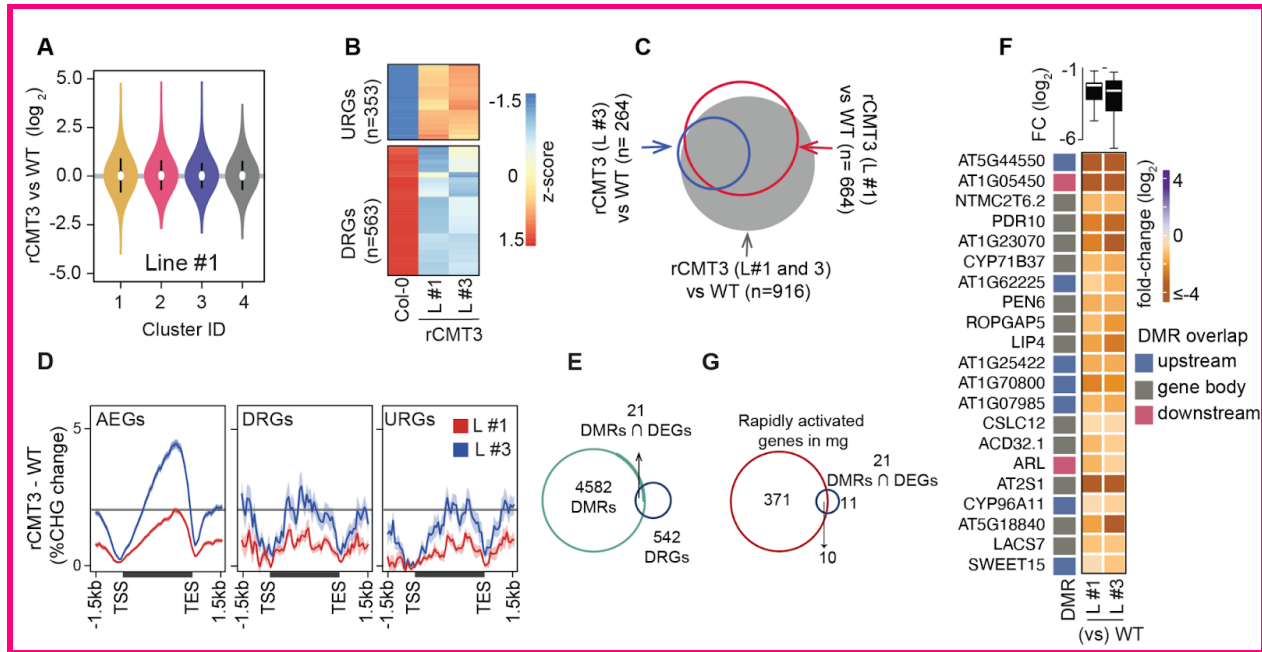

**Figure 5-figure supplement 185. Additional information regarding the influence of CMT3-induced hypermethylation on gene expression** (Related to Fig. 5). **A)** Violin plot showing expression fold change in rCMT3 (line #3) compared to WT wild-type (Col-0) bent cotyledon embryos per cluster as defined in Figure 4A. **B)** Scaled heatmap of differentially expressed genes (DEGs) when rCMT3 bent cotyledon are compared to WT with upregulated (URGs) and downregulated genes (DRGs) shown at the top and bottom, respectively. **C)** Three-way Venn diagram showing the proportion of DEGs overlapping with each labelled comparison. **D)** Metaplot of difference in CHG methylation in rCMT3 (line #1) (red) or rCMT3 (line #3) (blue) compared to WT wild-type for all expressed genes (AEGs, left), downregulated genes (DRGs, middle) and upregulated genes (URGs, right). **E)** Venn diagram showing overlap between hyper differentially methylated regions (DMRs) and down regulated genes (DRGs) in rCMT3 compared to WT wild-type bent cotyledon embryos. **F)** Boxplot showing  $\log_2$  fold-change (FC) of transcript levels between rCMT3 and Col-0 (WT) for all DRGs intersecting DMRs (top). Heatmap showing fold-change of individual DRGs (bottom). **G)** Venn diagram showing overlap between genes rapidly activated at mature green stage (cluster D6 genes based on (Hofmann et al., 2019)) and 21 DRGs/DMRs.

## 528 **Discussion**

529

530 DNA methylation is faithfully propagated across cell cycles by methyltransferases to ensure  
531 robust silencing of TEs (Borges et al., 2021; Law and Jacobsen, 2010; Mathieu et al., 2007;  
532 Ning et al., 2020; Probst et al., 2009; Saze et al., 2003). However, it is not well understood how  
533 DNA methyltransferases are regulated following periods of rapid division to prevent off-targeting  
534 of genes and their consequential repression. Cell division rates are highly dynamic during  
535 Arabidopsis embryogenesis. We found that the expression of MET1 and CMT3  
536 methyltransferases and corresponding CG and CHG methylation are intricately linked to mitotic  
537 indices through distinct mechanisms (Figure- 1). Moreover, miR823-mediated cleavage and  
538 repression of CMT3 following the proliferative early phase of embryogenesis helps prevent  
539 excess CMT3 from ectopically methylating protein-coding genes that can persist for weeks  
540 afterwards (Figure- 3). CMT3-induced hypermethylation of genes was highly associated with  
541 features conferring nucleosome stability (Figure- 4) and resulted in the repression of genes that  
542 are transcriptionally activated (Figure- 5). Repression of CMT3 following a period when it is  
543 needed in high quantity to keep pace with TE methylation therefore prevents CMT3 from  
544 ectopically targeting protein-coding genes for methylation. This resulting epigenetic collateral  
545 damage on protein-coding genes appears to can negatively affect gene expression. Our results  
546 are consistent with the model that CMT3-induced epimutations give rise to CG gene-body  
547 methylation (gbM) that can be maintained by MET1 across many generations (Wendte et al.,  
548 2019).

549 Complex mechanisms are required to specifically silence mutagenic TEs rather than  
550 endogenous genes (Antunez-Sanchez et al., 2020; Deng et al., 2016; Lee et al., 2021; Lister et  
551 al., 2008; Papareddy et al., 2020; Saze and Kakutani, 2011; Williams et al., 2015; Zhang et al.,  
552 2020). Mechanisms regulating epigenome homeostasis are of paramount importance during  
553 Arabidopsis embryogenesis due to highly dynamic cell cycle and transcriptional activities, as  
554 well as the establishment of cell lineages that will produce all future cell types including the  
555 gametes. MET1 and CMT3 methyltransferases are required for TE methylation (Kato et al.,  
556 2003; Stroud et al., 2014) and are expressed at high levels during early embryogenesis likely  
557 because this is a period of rapid cell division. CHG and CHH methylation exhibit opposite  
558 developmental dynamics depending on the tissue's mitotic index (Figures- 1, Figure 2, Figure 6)  
559 (Papareddy et al., 2020). When embryos are transitioning to stages with reduced cell division,  
560 decreased CMT3-mediated CHG methylation is correlated with increased CMT2-mediated CHH  
561 methylation (Figure- 2H). Unlike CMT2, CMT3 can also target protein-coding genes for CHG



methylation (Stroud et al., 2014) and lead to the recruitment of transcriptionally repressive H3K9me2 methyltransferases such as KYP (Du et al., 2014; Jackson et al., 2002; Lindroth et al., 2001). Therefore, handing over TE silencing to CMT2-dependent CHH methylation in cells with reduced division rates likely reduces ectopic methylation of protein-coding genes. In addition to what we observed during embryogenesis, varying degrees of mitotic indices across development can readily explain the genome-wide patterns of non-CG methylation reported thus far (Borges et al., 2021; Calarco et al., 2012; Gutzat et al., 2020; Ji et al., 2019; Kawakatsu et al., 2016, 2017; Lin et al., 2017; Narsai et al., 2017; Papareddy and Nodine, 2021).

CMT3, KYP and their corresponding DNA and histone methylation marks form interdependent feedback loops that perpetuate silencing through cell divisions (Du et al., 2015; Ning et al., 2020). Consistent with the transcription-coupled H3K9me2 demethylase IBM1 breaking these loops and preventing ectopic CHG hypermethylation of genes, we found that CMT3, KYP and IBM1 were highly expressed during early embryogenesis (Figure 3). After this rapidly dividing morphogenesis phase, transcripts from CMT3, KYP and IBM1 decrease, and miR823 directs the cleavage and repression of excess CMT3 to help prevent hypermethylation of protein-coding genes (Figure 3). Excess CMT3 induces CHG methylation on distinct regions of protein-coding genes that are characteristic of stable nucleosomes including transcriptionally repressive H3K9me2 marks that bind to CMT3. Although the distribution of CMT3-induced CHG hypermethylation is strikingly similar to CG gene-body methylation of genes (Figure 4B,C), this appears to be due to common targeting mechanisms by CMT3 and MET1 rather than a strict prerequisite of CG. In fact, mutants with reduced CG methylation (Figure 4-figure supplement 1S4OK) (Jacobsen and Meyerowitz, 1997; Lister et al., 2008; Saze and Kakutani, 2007; Stroud et al., 2013) or species largely devoid of genic CG methylation (Wendte et al., 2019) can still recruit CHG on genes. CMT3-induced CHG methylation of genes that we observed in rCMT3 transgenic plants was similar to ectopic gain of genic mCHG in *ddm1* mutants (Figure 4). Notably, heterochromatin becomes destabilized in *ddm1* mutants (Figure 4K) (Mathieu et al., 2003; Soppe et al., 2002) and CMT3 prefers features associated with stable (Figures 4E,F, Figure 4-figure supplement 1S4KG) (Bourguet et al., 2021; Osakabe et al., 2018; Yelagandula et al., 2014) over unstable nucleosomes such as H2A.Z with active marks (Figures 4H,I, Figure 4-figure supplement 1S4LH). Although destabilization of heterochromatin has been inversely correlated with genic CHG methylation (Ito et al., 2015; Zhang et al., 2020), chromatin features underlying this mechanism are unclear. Therefore, we propose that destabilization of heterochromatin in *ddm1* mutants redirects CMT3 to genic regions with stable nucleosomes. Therefore, factors such as DDM1 that stabilize heterochromatin may be yet another mechanism

596 required to regulate CMT3 activity in order to achieve proper epigenome homeostasis (Figure-  
597 6).

598 CMT3-induced CHG hypermethylation of genes did not globally affect steady state transcript  
599 levels (Figure- 5). However, we observed exceptional association between CHG  
600 hypermethylation and repression of genes that switch from transcriptionally inactive to active  
601 states. Because IBM1-mediated removal of H3K9me2 marks is coupled to transcription (Inagaki  
602 et al., 2017), it is possible that CMT3-induced methylation can form feedback loops with  
603 H3K9me2 methyltransferases when genes are transcriptionally inert. However, when genes are  
604 switched on, H3K9me2 could repress initial rounds of transcription before it is removed by  
605 IBM1. Accordingly, it may be difficult to detect the effects of ectopic CHG methylation on gene  
606 expression when quantifying transcripts at steady state with standard mRNA-seq. It is possible  
607 that we observed a repressive effect of CHG hypermethylation on a subset of genes because  
608 we profiled a developmental stage in which hundreds of genes become transcriptionally  
609 activated at the onset of embryo maturation. Nevertheless, we cannot completely exclude that  
610 the repression of hypermethylated genes undergoing transcriptional activation is due to  
611 secondary effects of other genes influenced by CMT3-induced hypermethylation. Importantly,  
612 CMT3-induced CHG hypermethylation due at least partially to loss of miR823 repression in  
613 embryos is largely maintained for weeks after detectable miRNA activity (Figure- 3). Therefore,  
614 epigenetic collateral damage occurring in embryos may also negatively impact gene expression  
615 later in life. However, future experiments are required to directly test the relationship between  
616 CMT3-induced hypermethylation and gene expression.

617 Transcriptional (Ning et al., 2020), post-transcriptional (Figure- 3), post-translational (Deng  
618 et al., 2016), post-hoc (Saze et al., 2008) and perhaps substrate-related (Figure- 4) mechanisms  
619 fine-tune CMT3 activities to levels required to specifically silence mutagenic TEs but not genes.  
620 However, errors in restricting CMT3 to heterochromatin are inevitable on an evolutionary  
621 timescale (Zhang et al., 2020) and recent studies indicate that CMT3-induced methylation of  
622 genes precedes gbM (Wendte et al., 2019). Because gbM can be stably maintained over many  
623 generations by MET1 and its functional significance is debatable (Bewick et al., 2016, 2019;  
624 Choi et al., 2019; Coleman-Derr and Zilberman, 2012; Le et al., 2020; Picard and Gehring,  
625 2017; Shahzad et al., 2021; Takuno and Gaut, 2013; Wendte et al., 2019; Williams et al., 2021;  
626 Zilberman, 2017), it cannot be excluded that gbM is merely an evolutionary record of epigenetic  
627 collateral damage events that occurred in the past (Bewick and Schmitz, 2017; Bewick et al.,  
628 2017). Our results suggest that derepressed CMT3 and MET1 both prefer genic regions  
629 characterized by increased nucleosome stability (Figure- 4). Accordingly, CMT3-induced CHG

630 hypermethylation tends to occur away from transcription start and end sites of genes in a nearly  
631 identical pattern as observed for gbM (Figure- 4). We propose that CHG methylation is more  
632 tolerated in central/3' biased regions because they are relatively inaccessible to trans-acting  
633 factors that regulate transcription. Moreover, our results tentatively suggest that CMT3-induced  
634 hypermethylation can repress genes that are transcriptionally activated (Figure- 5). Perhaps  
635 genes that are consistently expressed can accumulate CHG methylation without having a large  
636 effect on steady state transcript levels and resulting fitness penalties, and thus be more likely to  
637 accumulate gbM over evolutionary time. In other words, miR823-mediated repression is one of  
638 several ways to prevent CMT3 from ectopically methylating protein-coding genes. However,  
639 CMT3 off-targeting on genes may still occur despite these complex regulatory mechanisms and  
640 the resulting epigenetic collateral damage can be recorded as heritable gbM. The characteristic  
641 features of gbM may not pertain to its current functions, but rather the consequences of  
642 transient CHG methylation that occurred in the past and were selected on during evolution.



649 stable nucleosomes along with H3K9me2 and DNA methylation provides positive reinforcement to sequester CMT3  
650 to constitutive heterochromatin. (ii) Loss of DDM1 results in destabilized and accessible heterochromatin (Zhong et  
651 al., 2021), characterized by loss of H3K9me2 and stable nucleosomes (Osakabe et al., 2021). Accessible chromatin  
652 or DNA without stable nucleosomes is no longer a preferable substrate for CMT3 and results in CHG  
653 hypomethylation of TEs. CMT3 will now be readily available and redirected to genic regions where it induces  
654 ectopic CHG methylation in proportion to the levels of stable nucleosomes and chromatin marks. (iii) Excess levels  
655 of CMT3 causes genome-wide CHG hypermethylation with a preference for stable nucleosomes associated with  
656 repressive marks that tend to be in regions closer to centromeres compared to chromosomal arms.  
657

| Key Resources Table                                |                               |                          |             |                                                                                                  |
|----------------------------------------------------|-------------------------------|--------------------------|-------------|--------------------------------------------------------------------------------------------------|
| Reagent type (species) or resource                 | Designation                   | Source or reference      | Identifiers | Additional information                                                                           |
| gene<br>( <i>Arabidopsis thaliana</i> )            | CHROMOMETHYLASE 3 (CMT3)      | TAIR                     | AT1G69770   |                                                                                                  |
| gene<br>( <i>Arabidopsis thaliana</i> )            | MICRORNA 823A (MIR823A)       | TAIR                     | AT3G13724   |                                                                                                  |
| genetic reagent<br>( <i>Arabidopsis thaliana</i> ) | miR823-cleavable CMT3 (cCMT3) | this paper               |             | pAlligatorR43/promoterCMT3::genomic CMT3                                                         |
| genetic reagent<br>( <i>Arabidopsis thaliana</i> ) | miR823-resistant CMT3 (rCMT3) | this paper               |             | pAlligatorR43/promoterCMT3::resistant CMT3 (generated from cCMT3 with site-directed mutagenesis) |
| recombinant DNA reagent                            | pAlligatorR43 (plasmid)       | DOI: 10.7554/eLife.04501 |             | mCherry selection marker                                                                         |
| recombinant DNA reagent                            | pHSE401 (plasmid)             | Addgene                  | #62201      | CRISPR/Cas9 plasmid                                                                              |

|                                        |                                       |                          |                    |                                       |
|----------------------------------------|---------------------------------------|--------------------------|--------------------|---------------------------------------|
| recombinant DNA reagent                | pCBCD-T1T2 (plasmid)                  | Addgene                  | #50590             | CRISPR/Cas9 plasmid                   |
| strain ( <i>Arabidopsis thaliana</i> ) | <i>cmt3-11T</i>                       | NASC                     | SALK_148381        | T-DNA insertion mutant of <i>CMT3</i> |
| strain ( <i>Arabidopsis thaliana</i> ) | <i>mir823-1</i>                       | this paper               |                    | miR823 knockout mutant                |
| strain ( <i>Arabidopsis thaliana</i> ) | <i>mir823-2</i>                       | this paper               |                    | miR823 knockout mutant                |
| commercial kit                         | Q5 Site-Directed Mutagenesis Kit      | New England Biolabs      | #E0554S            |                                       |
| commercial kit                         | Fast SYBR Green Master Mix            | Roche                    | #06402712001       |                                       |
| commercial kit                         | SuperScript III Reverse Transcriptase | Thermo Fisher Scientific | #18080093          |                                       |
| commercial kit                         | TRIzol                                | Invitrogen               | #15596026          |                                       |
| Software                               | Lightcycler 96®                       | Roche Diagnostics        | Version 1.1.0.1320 |                                       |

660

#### 661 **Plant material and growth conditions**

662 *Arabidopsis thaliana* accession Columbia-0 (Col-0) were grown in controlled growth chambers  
663 at 20-22°C under a 16-h light/8-h dark cycle with incandescent lights (130 to 150  $\mu\text{mol}/\text{m}^2/\text{s}$ ).

664

#### 665 **Generation of transgenic lines**

666 The control genomic CMT3 construct (miR823-cleavable; cCMT3) was generated by PCR  
667 amplification of the CMT3 locus including 1,408 bp upstream and 730 bp downstream of the  
668 TAIR10-annotated transcription start and end sites, respectively. PCR primers included  
669 overhangs for subsequent Gibson assembly into MultiSite-Gateway destination vector

670 pAlligatorR43 (Kawashima et al., 2013). The miR823-resistant CMT3 construct (rCMT3) was  
671 generated by PCR site-directed mutagenesis (Q5 Site-Directed Mutagenesis Kit, New England  
672 Biolabs) using the cCMT3 construct as a template to introduce six silent mutations as shown in  
673 Figure 3-figure supplement 1—S3C. Both cCMT3 and rCMT3 construct sequences were  
674 analyzed for mutations using Sanger sequencing. All primers used are listed in the  
675 Supplementary File Table S5. The constructs were transformed into *cmt3-11T* (SALK\_148381)  
676 using the Agrobacterium floral dip method (Clough and Bent, 1998), and transformants were  
677 selected based on seed-coat RFP signal under fluorescent light (Zeiss SteREO DiscoveryV.8).  
678 Multiple independent first-generation transgenic (T1) lines were identified for cCMT3 and  
679 rCMT3, and three and four were respectively characterized in bent cotyledon embryos for each.  
680

#### 681 **Generation of CRISPR/Cas9 knockout mutants for *MIR823***

682 CRISPR/Cas9 knockout mutants in *MIR823* were created by using a modified pHSE401 binary  
683 vector (Addgene #62201) according to the protocol detailed by (Xing et al., 2014). Primers  
684 containing the sequences for the two guide RNAs targeting the *MIR823* locus flanking the  
685 miR823 sequence (Figure 3-figure supplement 1—S3A and Supplementary File Table S5) were  
686 amplified together with the pCBCD-T1T2 plasmid (Addgene #50590), and the resulting PCR  
687 product was subsequently assembled into the pHSE401 binary vector using GoldenGate  
688 cloning method (Xing et al., 2014). Plants were transformed with the floral dip method as  
689 described above; and Cas9-positive seeds were selected based on the presence of seed coat  
690 RFP signal. Deletion lines were identified with PCR using primers flanking gRNA-targeted sites  
691 (Figure 3-figure supplement 1—S3A and Supplementary File Table S5). Deletion mutants were  
692 confirmed and mapped by Sanger sequencing.  
693

#### 694 **qRT-PCR analysis**

695 Leaves (two-week old rosettes), floral clusters (five weeks) and bent cotyledon embryos (eight  
696 DAP) were homogenized in 500 µl TRIzol reagent (Invitrogen) and total RNA was isolated and  
697 purified according to manufacturer's recommendations. For mRNA, 200 ng of total RNA was  
698 used for cDNA synthesis with SuperScript III Reverse Transcriptase (Thermo Fisher Scientific).  
699 The cDNA was diluted two-fold for embryos or ten-fold for leaves and floral buds with  
700 nuclease-free water. Two µL of diluted cDNA was used as a template for the qRT-PCR with Fast  
701 SYBR Green Master Mix (Roche) on a LightCycler 96 instrument (Roche) with two technical  
702 replicates for each biorep. For miRNA823 quantification, corresponding stem-loop primers were  
703 added to the RT reaction (adapted from (Yang et al., 2014)) and miR823 levels were measured



704 using Fast SYBR Green Master Mix (Roche) with miRNA823 specific forward primer and a  
705 stem-loop specific universal reverse primer. U6 snRNA was used as the reference RNA  
706 (adapted from (Shen et al., 2010). Primers used for qRT-PCR are listed in [Supplementary File](#)  
707 [Table S5](#).

708

#### 709 **Sample size estimation, eEmbryo isolation and nucleic acid extraction**

710 Sample sizes were determined based on a combination of the required statistical power, ability  
711 to acquire samples and cost of the experiments. Bent cotyledon embryos were dissected from  
712 seeds eight days after pollination and also selected based on morphology to ensure accurate  
713 staging. Embryos were serially washed 4× with nuclease-free water under an inverted  
714 microscope. Approximately 50 embryos per replicate were isolated and stored at -80 °C until  
715 further use. RNA was isolated as previously described (Lutzmayer et al., 2017; Plotnikova et al.,  
716 2019). Genomic DNA was extracted from embryos and three-week old plants using  
717 *Quick-DNA<sup>TM</sup>* Micro prep Kit (Zymo D3020) according to the recommendations of the  
718 manufacturer.

719

#### 720 **DNA methylation profiling and analysis**

721 MethylC-Seq libraries were generated as described previously (Papareddy et al., 2020) and  
722 sequenced in single-read mode on an Illumina HiSeq 2500 or Nextseq 550 instrument. Adapters  
723 and the first six bases corresponding to random hexamers used during the pre-amplification  
724 step were trimmed from MethylC-seq reads using *Trim Galore*. Bisulfite-converted reads were  
725 aligned against the TAIR10 genome (Lamesch et al., 2012) in non-directional mode using  
726 *Bismark* (*bismark --non\_directional -q --score-min L,0,-0.4*) (Krueger and Andrews, 2011).  
727 *Methylpy* software was used to extract weighted methylation rates for each available cytosine  
728 from BAM files containing only deduplicated and uniquely mapped reads (Schultz et al., 2015).  
729 Reads mapping to the unmethylated chloroplast genome were used to calculate bisulfite  
730 conversion rates. FASTQ files obtained from publicly available methylomes generated from  
731 sperm (Ibarra et al., 2012), early torpedo (Pignatta et al., 2015), mid-torpedo to early maturation  
732 (Hsieh et al., 2009), mature green embryos (Bouyer et al., 2017) and DNA methylation mutant  
733 leaves (Stroud et al., 2013) were also processed in a similar manner except that alignments  
734 were performed in directional mode and only 5' end nucleotides of the reads with m-bias were  
735 removed. Differentially methylated regions (DMRs) were identified using *Methylpy* (Schultz et  
736 al., 2015). Briefly, [two](#) biological replicates were pooled and differentially methylated cytosines  
737 (DMCs) were identified by root mean squared tests with false discovery rates  $\leq 0.01$ . DMRs

were defined by collapsing DMCs with  $\geq 4$  reads within 500 bps to single units requiring  $\geq 8$  and  $\geq 4$  DMCs for CG and CHN sites, respectively ( $N = A, T, C, G$ ;  $H \neq G$ ). Using these parameters, DMRs were identified across floral bud, early heart, early torpedo, bent cotyledon, mature green and leaf samples, and merged into a single bedFile using the BEDtools *merge* function (Quinlan and Hall, 2010). Resulting DMRs were then used to calculate the methylation rate on all analyzed tissues and genotypes. We assigned that a gene and a DMR are associated if the DMR is overlapping within 1.5 kb upstream or downstream of TAIR10 annotated gene bodies using BEDtools *closest* function. For down-regulated genes overlapping with DMRs with above criteria, significance was tested using BEDtools *fisher* function with nuclear genome as a background control.

#### mRNA profiling and analysis

Smart-seq2 mRNA libraries were generated from 1  $\mu$ l of the 7  $\mu$ l bent cotyledon embryo total RNA as previously described (Hofmann et al., 2019; Picelli et al., 2014). Both amplified cDNA and final libraries were inspected using Agilent HS NGS Fragment Kit (DNF-474) to control for library quality and proper length distributions. Libraries were sequenced in single-read mode on an Illumina HiSeq 2500 or NextSeq 550 machine. Raw FASTQ files from technical replicates were merged, quality filtered and trimmed for adapter sequences with *Trim Galore* using default parameters. Trimmed reads were aligned using STAR (Dobin et al., 2013) against a genome index generated using the TAIR10 genome fasta file and all transcripts in the GTF of Ensembl build TAIR10 annotation set (release version 44). Aligned transcriptome bam files were used to quantify read counts per gene and transcript abundance using RSEM (Li and Dewey, 2011). Along with the transcriptomes generated in this study, publicly available embryonic transcriptomes (Hofman et al., 2019) used for PCA were analyzed in the same fashion as described above (Supplementary File Table S6). Prior to PCA (Figure 5A), read counts derived from nuclear protein-coding genes were subjected to variance stabilizing transformations using DESeq2 (Love et al., 2014). Differential gene expression analysis was performed using DESeq2 for genes with at least five aligned reads. Genes with  $\geq 2$ -fold differences and adjusted p-value  $\leq 0.01$  were classified as differentially expressed genes (DEGs). Nearest-neighbour genes in Figure 1A,B were classified based on Euclidean distance. First, the centroid expression of MET1 and VIM1/2/3 was calculated for all tissue types represented in the developmental time series. This centroid value was then used to calculate Euclidean distance of all TAIR10-annotated protein-coding genes and sorted based on their distances.

## 772 **ChIP-seq analysis**

773 ChIP-seq data for H2A variants and H3K9me2 were downloaded from GSE50942 (Yelagandula  
774 et al., 2014) and GSE51304 (Stroud et al., 2014) respectively. H3K9 acetylation marks were  
775 from GSE98214 (Wang et al., 2019). H3K4me3 marks were obtained from GSE152243 (Maher,  
776 2020). All FASTQ files were trimmed and quality filtered using *Trim Galore* default parameters.  
777 Trimmed reads were aligned against the TAIR10 genome using BWA-MEM (Li and Durbin,  
778 2009). Multi-mapping reads and clonal duplicates were removed using *MarkDuplicates* from the  
779 Picard Tools suite (Toolkit, 2019). The resulting BAM files containing alignments were sorted,  
780 indexed and used as input for the *bamCoverage* function of deepTools (Ramírez et al., 2014) to  
781 obtain genome normalized coverage with parameters *--normalizeUsing 'RPGC'*. Processed  
782 bigwig files for H1 Chromatin Affinity purification followed by sequencing (ChAP) and  
783 DNase-seq datasets were obtained from GSE122394 (Choi et al., 2019). MNase-Seq data was  
784 obtained from GSE113556 (Rutowicz et al., 2019). ATAC-seq processed bigwig files for *WTwild-*  
785 *type* and *ddm1* mutants were from GSE155503 (Zhong et al., 2021).

786

## 787 **Metaplots**

788 ChIP, ATAC, MNase, DNase and MethylC-seq metaplots were plotted using the R library  
789 *Seqplots* (Stempor and Ahringer, 2016). Body, upstream, and downstream regions of TEs or  
790 genes were split into equal-sized bins, and the average levels for each bin was calculated and  
791 plotted.

792

## 793 **CMT3 transgene copy number estimation**

794 CMT3 transgene copy number was estimated using two methods: qPCR and coverage  
795 calculation. For the qPCR method, genomic DNA was extracted from leaves of three-week old  
796 plants using the CTAB DNA isolation method (Aboul-Maaty and Oraby, 2019). Relative  
797 transgene copy number was determined by using the qPCR-based method as described  
798 (Shepherd et al., 2009). *ACTIN2* was used as a control gene while transgene copy number was  
799 calculated based on CMT3 levels. For the coverage method, Bismark-aligned and deduplicated  
800 BAM files from *WTwild-type*, cCMT3 and rCMT3 lines were processed with DeepTools to obtain  
801 normalized genome coverage as bins per million mapped reads (BPM) units with the  
802 *bamCoverage* function and following parameters: *--binsize 50 --skipNAs --normalizeUsing 'BPM'*  
803 *--ignoreForNormalization mitochondria chloroplast*. The resulting bigwig files were used to  
804 calculate genome-wide coverage fold-changes relative to *WTwild-type* using the deepTools  
805 function *bigwigCompare --skipNAs --operation "ratio"*. CMT3 locus was displayed with the

806 Integrative Genomics Viewer (IGV)

807

### 808 **Availability of data and material**

809 All sequencing data generated in this study are available at the National Center for  
810 Biotechnology Information Gene Expression Omnibus (NCBI GEO,  
811 <https://www.ncbi.nlm.nih.gov/geo/>) under accession number GSE171198. ChIP-Seq and  
812 mRNA-seq bioinformatic analysis pipelines were based on Nextflow (Di Tommaso et al., 2017)  
813 and the nf-core framework (Ewels et al., 2020) are available at  
814 <https://github.com/Gregor-Mendel-Institute/RKP2021-CMT3>.

815

### 816 **Contributions**

817 ~~R.K.P. and M.D.N. conceived the project; R.K.P. and K.P. developed the methodology; R.K.P.,~~  
818 ~~K.P. and A.D.S. conducted the experiments; R.K.P. and P.H. developed the software and~~  
819 ~~performed formal analysis; C.B. supervised P.H; R.K.P. and M.D.N. wrote and edited the~~  
820 ~~manuscript; M.D.N. supervised the project and acquired funding.~~

### 821 **Acknowledgements**

822 We thank the Vienna Biocenter Core Facilities GmbH (VBCF) Next Generation Sequencing and  
823 Plant Sciences Facilities for next-generation sequencing and plant growth chamber access,  
824 respectively, and the Institute of Molecular Pathology-Institute of Molecular Biology-Gregor  
825 Mendel Institute Molecular Biology Services for instrument access and support. R.K.P  
826 personally thanks Pierre Bourguet and Michael Borg for invaluable discussions. We also thank  
827 Zdravko Lorkovic, Bhagyshree Jamge, Robin Burns, Eriko Sasaki, Magnus Nordborg and  
828 Frédéric Berger for sharing thoughts and reagents; and members of the Nodine lab for valuable  
829 input. This work was supported by the European Research Council under the European Union's  
830 Horizon 2020 Research and Innovation Program grant 637888 to M.D.N.

## 831 **References**

- 832 Aboul-Maaty, N.A.-F., and Oraby, H.A.-S. (2019). Extraction of high-quality genomic DNA from  
833 different plant orders applying a modified CTAB-based method. *Bull. Natl. Salmon Resour. Cent.*  
834 *43*.
- 835 Antunez-Sanchez, J., Naish, M., Ramirez-Prado, J.S., Ohno, S., Huang, Y., Dawson, A.,  
836 Opassathian, K., Manza-Mianza, D., Ariel, F., Raynaud, C., et al. (2020). A new role for histone  
837 demethylases in the maintenance of plant genome integrity. *Elife* *9*.
- 838 Arabidopsis Genome Initiative (2000). Analysis of the genome sequence of the flowering plant  
839 *Arabidopsis thaliana*. *Nature* *408*, 796–815.
- 840 Bewick, A.J., and Schmitz, R.J. (2017). Gene body DNA methylation in plants. *Curr. Opin. Plant*  
841 *Biol.* *36*, 103–110.
- 842 Bewick, A.J., Ji, L., Niederhuth, C.E., Willing, E.-M., Hofmeister, B.T., Shi, X., Wang, L., Lu, Z.,  
843 Rohr, N.A., Hartwig, B., et al. (2016). On the origin and evolutionary consequences of gene  
844 body DNA methylation. *Proc. Natl. Acad. Sci. U. S. A.* *113*, 9111–9116.
- 845 Bewick, A.J., Niederhuth, C.E., Ji, L., Rohr, N.A., Griffin, P.T., Leebens-Mack, J., and Schmitz,  
846 R.J. (2017). The evolution of CHROMOMETHYLASES and gene body DNA methylation in  
847 plants. *Genome Biol.* *18*, 65.
- 848 Bewick, A.J., Zhang, Y., Wendte, J.M., Zhang, X., and Schmitz, R.J. (2019). Evolutionary and  
849 Experimental Loss of Gene Body Methylation and Its Consequence to Gene Expression. *G3* *9*,  
850 2441–2445.
- 851 Blevins, T., Podicheti, R., Mishra, V., Marasco, M., Wang, J., Rusch, D., Tang, H., and Pikaard,  
852 C.S. (2015). Identification of Pol IV and RDR2-dependent precursors of 24 nt siRNAs guiding de  
853 novo DNA methylation in *Arabidopsis*. *Elife* *4*, e09591.
- 854 Borges, F., Donoghue, M.T.A., LeBlanc, C., Wear, E.E., Tanurdžić, M., Berube, B., Brooks, A.,  
855 Thompson, W.F., Hanley-Bowdoin, L., and Martienssen, R.A. (2021). Loss of  
856 Small-RNA-Directed DNA Methylation in the Plant Cell Cycle Promotes Germline  
857 Reprogramming and Somaclonal Variation. *Curr. Biol.* *31*, 591–600.e4.
- 858 Bourguet, P., Picard, C.L., Yelagandula, R., Pélissier, T., Lorković, Z.J., Feng, S.,  
859 Pouch-Pélissier, M.-N., Schmücker, A., Jacobsen, S.E., Berger, F., et al. (2021). The histone  
860 variant H2A.W and linker histone H1 co-regulate heterochromatin accessibility and DNA  
861 methylation. *bioRxiv* doi: <https://doi.org/10.1101/2020.03.19.998609>.
- 862 Bouyer, D., Kramdi, A., Kassam, M., Heese, M., Schnittger, A., Roudier, F., and Colot, V. (2017).  
863 DNA methylation dynamics during early plant life. *Genome Biol.* *18*, 179.
- 864 Calarco, J.P., Borges, F., Donoghue, M.T.A., Van Ex, F., Jullien, P.E., Lopes, T., Gardner, R.,  
865 Berger, F., Feijó, J.A., Becker, J.D., et al. (2012). Reprogramming of DNA methylation in pollen  
866 guides epigenetic inheritance via small RNA. *Cell* *151*, 194–205.
- 867 Cao, X., and Jacobsen, S.E. (2002). Locus-specific control of asymmetric and CpNpG  
868 methylation by the DRM and CMT3 methyltransferase genes. *Proc. Natl. Acad. Sci. U. S. A.* *99*  
869 *Suppl 4*, 16491–16498.

870 Chodavarapu, R.K., Feng, S., Bernatavichute, Y.V., Chen, P.-Y., Stroud, H., Yu, Y., Hetzel, J.A.,  
871 Kuo, F., Kim, J., Cokus, S.J., et al. (2010). Relationship between nucleosome positioning and  
872 DNA methylation. *Nature* 466, 388–392.

873 Choi, J., Lyons, D.B., Kim, M.Y., Moore, J.D., and Zilberman, D. (2019). DNA Methylation and  
874 Histone H1 Jointly Repress Transposable Elements and Aberrant Intragenic Transcripts. *Mol.*  
875 *Cell*.

876 Clough, S.J., and Bent, A.F. (1998). Floral dip: a simplified method for *Agrobacterium*-mediated  
877 transformation of *Arabidopsis thaliana*: Floral dip transformation of *Arabidopsis*. *Plant J.* 16,  
878 735–743.

879 Cokus, S.J., Feng, S., Zhang, X., Chen, Z., Merriman, B., Haudenschild, C.D., Pradhan, S.,  
880 Nelson, S.F., Pellegrini, M., and Jacobsen, S.E. (2008). Shotgun bisulphite sequencing of the  
881 *Arabidopsis* genome reveals DNA methylation patterning. *Nature* 452, 215–219.

882 Coleman-Derr, D., and Zilberman, D. (2012). Deposition of histone variant H2A.Z within gene  
883 bodies regulates responsive genes. *PLoS Genet.* 8, e1002988.

884 Deng, S., Jang, I.-C., Su, L., Xu, J., and Chua, N.-H. (2016). JMJ24 targets  
885 CHROMOMETHYLASE3 for proteasomal degradation in *Arabidopsis*. *Genes Dev.* 30, 251–256.

886 Di Tommaso, P., Chatzou, M., Floden, E.W., Barja, P.P., Palumbo, E., and Notredame, C.  
887 (2017). Nextflow enables reproducible computational workflows. *Nat. Biotechnol.* 35, 316–319.

888 Dobin, A., Davis, C.A., Schlesinger, F., Drenkow, J., Zaleski, C., Jha, S., Batut, P., Chaisson, M.,  
889 and Gingeras, T.R. (2013). STAR: ultrafast universal RNA-seq aligner. *Bioinformatics* 29, 15–21.

890 Du, J., Zhong, X., Bernatavichute, Y.V., Stroud, H., Feng, S., Caro, E., Vashisht, A.A., Terragni,  
891 J., Chin, H.G., Tu, A., et al. (2012). Dual binding of chromomethylase domains to  
892 H3K9me2-containing nucleosomes directs DNA methylation in plants. *Cell* 151, 167–180.

893 Du, J., Johnson, L.M., Groth, M., Feng, S., Hale, C.J., Li, S., Vashisht, A.A., Wohlschlegel, J.A.,  
894 Patel, D.J., and Jacobsen, S.E. (2014). Mechanism of DNA methylation-directed histone  
895 methylation by KRYPTONITE. *Mol. Cell* 55, 495–504.

896 Du, J., Johnson, L.M., Jacobsen, S.E., and Patel, D.J. (2015). DNA methylation pathways and  
897 their crosstalk with histone methylation. *Nat. Rev. Mol. Cell Biol.* 16, 519–532.

898 Ewels, P.A., Peltzer, A., Fillinger, S., Patel, H., Alneberg, J., Wilm, A., Garcia, M.U., Di  
899 Tommaso, P., and Nahnsen, S. (2020). The nf-core framework for community-curated  
900 bioinformatics pipelines. *Nat. Biotechnol.* 38, 276–278.

901 Fan, Y., Nikitina, T., Morin-Kensicki, E.M., Zhao, J., Magnuson, T.R., Woodcock, C.L., and  
902 Skoultschi, A.I. (2003). H1 linker histones are essential for mouse development and affect  
903 nucleosome spacing in vivo. *Mol. Cell. Biol.* 23, 4559–4572.

904 Feng, S., Cokus, S.J., Zhang, X., Chen, P.-Y., Bostick, M., Goll, M.G., Hetzel, J., Jain, J.,  
905 Strauss, S.H., Halpern, M.E., et al. (2010). Conservation and divergence of methylation  
906 patterning in plants and animals. *Proc. Natl. Acad. Sci. U. S. A.* 107, 8689–8694.

907 Finnegan, E.J., and Dennis, E.S. (1993). Isolation and identification by sequence homology of a  
908 putative cytosine methyltransferase from *Arabidopsis thaliana*. *Nucleic Acids Res.* 21,



909 2383–2388.

910 Gouil, Q., and Baulcombe, D.C. (2016). DNA Methylation Signatures of the Plant  
911 Chromomethyltransferases. *PLoS Genet.* 12, e1006526.

912 Gutzat, R., Rembart, K., Nussbaumer, T., Hofmann, F., Pisupati, R., Bradamante, G., Daubel,  
913 N., Gaidora, A., Lettner, N., Donà, M., et al. (2020). Arabidopsis shoot stem cells display  
914 dynamic transcription and DNA methylation patterns. *EMBO J.* 39, e103667.

915 Henderson, I.R., and Jacobsen, S.E. (2007). Epigenetic inheritance in plants. *Nature* 447,  
916 418–424.

917 Henderson, I.R., and Jacobsen, S.E. (2008). Tandem repeats upstream of the Arabidopsis  
918 endogene SDC recruit non-CG DNA methylation and initiate siRNA spreading. *Genes Dev.* 22,  
919 1597–1606.

920 Herr, A.J., Jensen, M.B., Dalmay, T., and Baulcombe, D.C. (2005). RNA polymerase IV directs  
921 silencing of endogenous DNA. *Science* 308, 118–120.

922 Hofmann, F., Schon, M.A., and Nodine, M.D. (2019). The embryonic transcriptome of  
923 Arabidopsis thaliana. *Plant Reprod.* 32, 77–91.

924 Hsieh, T.-F., Ibarra, C.A., Silva, P., Zemach, A., Eshed-Williams, L., Fischer, R.L., and  
925 Zilberman, D. (2009). Genome-wide demethylation of Arabidopsis endosperm. *Science* 324,  
926 1451–1454.

927 Ibarra, C.A., Feng, X., Schoft, V.K., Hsieh, T.-F., Uzawa, R., Rodrigues, J.A., Zemach, A.,  
928 Chumak, N., Machlicova, A., Nishimura, T., et al. (2012). Active DNA demethylation in plant  
929 companion cells reinforces transposon methylation in gametes. *Science* 337, 1360–1364.

930 Inagaki, S., Miura-Kamio, A., Nakamura, Y., Lu, F., Cui, X., Cao, X., Kimura, H., Saze, H., and  
931 Kakutani, T. (2010). Autocatalytic differentiation of epigenetic modifications within the  
932 Arabidopsis genome. *EMBO J.* 29, 3496–3506.

933 Inagaki, S., Takahashi, M., Hosaka, A., Ito, T., Toyoda, A., Fujiyama, A., Tarutani, Y., and  
934 Kakutani, T. (2017). Gene-body chromatin modification dynamics mediate epigenome  
935 differentiation in Arabidopsis. *EMBO J.* 36, 970–980.

936 Ito, T., Tarutani, Y., To, T.K., Kassam, M., Duvernois-Berthet, E., Cortijo, S., Takashima, K.,  
937 Saze, H., Toyoda, A., Fujiyama, A., et al. (2015). Genome-Wide Negative Feedback Drives  
938 Transgenerational DNA Methylation Dynamics in Arabidopsis. *PLOS Genetics* 11, e1005154.

939 Jackson, J.P., Lindroth, A.M., Cao, X., and Jacobsen, S.E. (2002). Control of CpNpG DNA  
940 methylation by the KRYPTONITE histone H3 methyltransferase. *Nature* 416, 556–560.

941 Jacobsen, S.E., and Meyerowitz, E.M. (1997). Hypermethylated SUPERMAN epigenetic alleles  
942 in arabidopsis. *Science* 277, 1100–1103.

943 Ji, L., Mathioni, S.M., Johnson, S., Tucker, D., Bewick, A.J., Do Kim, K., Daron, J., Slotkin, R.K.,  
944 Jackson, S.A., Parrott, W.A., et al. (2019). Genome-Wide Reinforcement of DNA Methylation  
945 Occurs during Somatic Embryogenesis in Soybean. *Plant Cell* 31, 2315–2331.

946 Kato, M., Miura, A., Bender, J., Jacobsen, S.E., and Kakutani, T. (2003). Role of CG and

947 non-CG methylation in immobilization of transposons in Arabidopsis. *Curr. Biol.* **13**, 421–426.

948 Kawakatsu, T., Stuart, T., Valdes, M., Breakfield, N., Schmitz, R.J., Nery, J.R., Urich, M.A., Han,  
 949 X., Lister, R., Benfey, P.N., et al. (2016). Unique cell-type-specific patterns of DNA methylation in  
 950 the root meristem. *Nat Plants* **2**, 16058.

951 Kawakatsu, T., Nery, J.R., Castanon, R., and Ecker, J.R. (2017). Dynamic DNA methylation  
 952 reconfiguration during seed development and germination. *Genome Biol.* **18**, 171.

953 Kawashima, T., Kitamura, K., Suzuki, K., Nonaka, M., Kamijo, S., Takemoto-Kimura, S., Kano,  
 954 M., Okuno, H., Ohki, K., and Bito, H. (2013). Functional labeling of neurons and their projections  
 955 using the synthetic activity-dependent promoter E-SARE. *Nature Methods* **10**, 889–895.

956 Krueger, F., and Andrews, S.R. (2011). Bismark: a flexible aligner and methylation caller for  
 957 Bisulfite-Seq applications. *Bioinformatics* **27**, 1571–1572.

958 Lamesch, P., Berardini, T.Z., Li, D., Swarbreck, D., Wilks, C., Sasidharan, R., Muller, R., Dreher,  
 959 K., Alexander, D.L., Garcia-Hernandez, M., et al. (2012). The Arabidopsis Information Resource  
 960 (TAIR): improved gene annotation and new tools. *Nucleic Acids Res.* **40**, D1202–D1210.

961 Law, J.A., and Jacobsen, S.E. (2010). Establishing, maintaining and modifying DNA methylation  
 962 patterns in plants and animals. *Nat. Rev. Genet.* **11**, 204–220.

963 Le, N.T., Harukawa, Y., Miura, S., Boer, D., Kawabe, A., and Saze, H. (2020). Epigenetic  
 964 regulation of spurious transcription initiation in Arabidopsis. *Nat. Commun.* **11**, 3224.

965 Lee, Y.-S., Maple, R., Dürr, J., Dawson, A., Tamim, S., Del Genio, C., Papareddy, R., Luo, A.,  
 966 Lamb, J.C., Amantia, S., et al. (2021). A transposon surveillance mechanism that safeguards  
 967 plant male fertility during stress. *Nat Plants* **7**, 34–41.

968 Li, B., and Dewey, C.N. (2011). RSEM: accurate transcript quantification from RNA-Seq data  
 969 with or without a reference genome. *BMC Bioinformatics* **12**, 323.

970 Li, H., and Durbin, R. (2009). Fast and accurate short read alignment with Burrows–Wheeler  
 971 transform. *Bioinformatics* **25**, 1754–1760.

972 Li, X., Harris, C.J., Zhong, Z., Chen, W., Liu, R., Jia, B., Wang, Z., Li, S., Jacobsen, S.E., and  
 973 Du, J. (2018). Mechanistic insights into plant SUVH family H3K9 methyltransferases and their  
 974 binding to context-biased non-CG DNA methylation. *Proc. Natl. Acad. Sci. U. S. A.* **115**,  
 975 E8793–E8802.

976 Lin, J.-Y., Le, B.H., Chen, M., Henry, K.F., Hur, J., Hsieh, T.-F., Chen, P.-Y., Pelletier, J.M.,  
 977 Pellegrini, M., Fischer, R.L., et al. (2017). Similarity between soybean and Arabidopsis seed  
 978 methylomes and loss of non-CG methylation does not affect seed development. *Proc. Natl.*  
 979 *Acad. Sci. U. S. A.* **114**, E9730–E9739.

980 Lindroth, A.M., Cao, X., Jackson, J.P., Zilberman, D., McCallum, C.M., Henikoff, S., and  
 981 Jacobsen, S.E. (2001). Requirement of CHROMOMETHYLASE3 for maintenance of CpXpG  
 982 methylation. *Science* **292**, 2077–2080.

983 Lippman, Z., Gendrel, A.-V., Black, M., Vaughn, M.W., Dedhia, N., McCombie, W.R., Lavine, K.,  
 984 Mittal, V., May, B., Kasschau, K.D., et al. (2004). Role of transposable elements in  
 985 heterochromatin and epigenetic control. *Nature* **430**, 471–476.



986 Lister, R., O'Malley, R.C., Tonti-Filippini, J., Gregory, B.D., Berry, C.C., Millar, A.H., and Ecker,  
 987 J.R. (2008). Highly integrated single-base resolution maps of the epigenome in Arabidopsis.  
 988 *Cell* **133**, 523–536.

989 Love, M.I., Huber, W., and Anders, S. (2014). Moderated estimation of fold change and  
 990 dispersion for RNA-seq data with DESeq2. *Genome Biol.* **15**, 550.

991 Lutzmayer, S., Enugutti, B., and Nodine, M.D. (2017). Novel small RNA spike-in  
 992 oligonucleotides enable absolute normalization of small RNA-Seq data. *Sci. Rep.* **7**, 5913.

993 Maher, K.A. (2020). Applications of Next-Generation Sequencing Strategies for the Identification  
 994 and Characterization of Enhancers in Plants. Emory University.

995 Mathieu, O., Jasencakova, Z., Vaillant, I., Gendrel, A.-V., Colot, V., Schubert, I., and Tourmente,  
 996 S. (2003). Changes in 5S rDNA chromatin organization and transcription during  
 997 heterochromatin establishment in Arabidopsis. *Plant Cell* **15**, 2929–2939.

998 Mathieu, O., Reinders, J., Caikovski, M., Smathajitt, C., and Paszkowski, J. (2007).  
 999 Transgenerational stability of the Arabidopsis epigenome is coordinated by CG methylation. *Cell*  
 1000 **130**, 851–862.

1001 Miura, A., Nakamura, M., Inagaki, S., Kobayashi, A., Saze, H., and Kakutani, T. (2009). An  
 1002 Arabidopsis jmjC domain protein protects transcribed genes from DNA methylation at CHG  
 1003 sites. *EMBO J.* **28**, 1078–1086.

1004 Muyle, A., and Gaut, B.S. (2019). Loss of Gene Body Methylation in *Eutrema salsugineum* Is  
 1005 Associated with Reduced Gene Expression. *Mol. Biol. Evol.* **36**, 155–158.

1006 Narsai, R., Gouil, Q., Secco, D., Srivastava, A., Karpievitch, Y.V., Liew, L.C., Lister, R., Lewsey,  
 1007 M.G., and Whelan, J. (2017). Extensive transcriptomic and epigenomic remodelling occurs  
 1008 during Arabidopsis thaliana germination. *Genome Biol.* **18**, 172.

1009 Niederhuth, C.E., Bewick, A.J., Ji, L., Alabady, M.S., Kim, K.D., Li, Q., Rohr, N.A., Rambani, A.,  
 1010 Burke, J.M., Udall, J.A., et al. (2016). Widespread natural variation of DNA methylation within  
 1011 angiosperms. *Genome Biol.* **17**, 194.

1012 Ning, Y.-Q., Liu, N., Lan, K.-K., Su, Y.-N., Li, L., Chen, S., and He, X.-J. (2020). DREAM  
 1013 complex suppresses DNA methylation maintenance genes and precludes DNA  
 1014 hypermethylation. *Nat Plants* **6**, 942–956.

1015 Osakabe, A., Lorkovic, Z.J., Kobayashi, W., Tachiwana, H., Yelagandula, R., Kurumizaka, H.,  
 1016 and Berger, F. (2018). Histone H2A variants confer specific properties to nucleosomes and  
 1017 impact on chromatin accessibility. *Nucleic Acids Res.* **46**, 7675–7685.

1018 Osakabe, A., Jamge, B., Axelsson, E., Montgomery, S.A., Akimcheva, S., Kuehn, A.L., Pisupati,  
 1019 R., Lorković, Z.J., Yelagandula, R., Kakutani, T., et al. (2021). The chromatin remodeler DDM1  
 1020 prevents transposon mobility through deposition of histone variant H2A.W. *Nat. Cell Biol.* **23**,  
 1021 391–400.

1022 Papareddy, R.K., and Nodine, M.D. (2021). Plant Epigenetics: Propelling DNA Methylation  
 1023 Variation across the Cell Cycle. *Curr. Biol.* **31**, R129–R131.

1024 Papareddy, R.K., Páldi, K., Paulraj, S., Kao, P., Lutzmayer, S., and Nodine, M.D. (2020).

1025 Chromatin regulates expression of small RNAs to help maintain transposon methylome  
1026 homeostasis in Arabidopsis. *Genome Biol.* 21, 251.

1027 Picard, C.L., and Gehring, M. (2017). Proximal methylation features associated with nonrandom  
1028 changes in gene body methylation. *Genome Biol.* 18, 73.

1029 Picelli, S., Faridani, O.R., Björklund, A.K., Winberg, G., Sagasser, S., and Sandberg, R. (2014).  
1030 Full-length RNA-seq from single cells using Smart-seq2. *Nat. Protoc.* 9, 171–181.

1031 Pignatta, D., Erdmann, R.M., Scheer, E., Picard, C.L., Bell, G.W., and Gehring, M. (2015).  
1032 Correction: Natural epigenetic polymorphisms lead to intraspecific variation in Arabidopsis gene  
1033 imprinting. *Elife* 4.

1034 Plotnikova, A., Kellner, M.J., Schon, M.A., Mosiolek, M., and Nodine, M.D. (2019). MicroRNA  
1035 Dynamics and Functions During Arabidopsis Embryogenesis. *Plant Cell* 31, 2929–2946.

1036 Probst, A.V., Dunleavy, E., and Almouzni, G. (2009). Epigenetic inheritance during the cell cycle.  
1037 *Nat. Rev. Mol. Cell Biol.* 10, 192–206.

1038 Quinlan, A.R., and Hall, I.M. (2010). BEDTools: a flexible suite of utilities for comparing genomic  
1039 features. *Bioinformatics* 26, 841–842.

1040 Ramírez, F., Dündar, F., Diehl, S., Grüning, B.A., and Manke, T. (2014). deepTools: a flexible  
1041 platform for exploring deep-sequencing data. *Nucleic Acids Res.* 42, W187–W191.

1042 Rutowicz, K., Lirski, M., Mermaz, B., Teano, G., Schubert, J., Mestiri, I., Kroteń, M.A., Fabrice,  
1043 T.N., Fritz, S., Grob, S., et al. (2019). Linker histones are fine-scale chromatin architects  
1044 modulating developmental decisions in Arabidopsis. *Genome Biol.* 20, 157.

1045 Saze, H., and Kakutani, T. (2007). Heritable epigenetic mutation of a transposon–flanked  
1046 Arabidopsis gene due to lack of the chromatin–remodeling factor DDM1. *EMBO J.*

1047 Saze, H., and Kakutani, T. (2011). Differentiation of epigenetic modifications between  
1048 transposons and genes. *Curr. Opin. Plant Biol.* 14, 81–87.

1049 Saze, H., Mittelsten Scheid, O., and Paszkowski, J. (2003). Maintenance of CpG methylation is  
1050 essential for epigenetic inheritance during plant gametogenesis. *Nat. Genet.* 34, 65–69.

1051 Saze, H., Shiraishi, A., Miura, A., and Kakutani, T. (2008). Control of genic DNA methylation by  
1052 a jmjC domain-containing protein in Arabidopsis thaliana. *Science* 319, 462–465.

1053 Scheid, O.M., Afsar, K., and Paszkowski, J. (1998). Release of epigenetic gene silencing by  
1054 trans-acting mutations in Arabidopsis. *Proc. Natl. Acad. Sci. U. S. A.* 95, 632–637.

1055 Schultz, M.D., He, Y., Whitaker, J.W., Hariharan, M., Mukamel, E.A., Leung, D., Rajagopal, N.,  
1056 Nery, J.R., Urich, M.A., Chen, H., et al. (2015). Human body epigenome maps reveal  
1057 noncanonical DNA methylation variation. *Nature* 523, 212–216.

1058 Shahzad, Z., Moore, J.D., and Zilberman, D. (2021). Gene body methylation mediates  
1059 epigenetic inheritance of plant traits. *bioRxiv* doi: <https://doi.org/10.1101/2021.03.15.435374>.

1060 Shen, J., Xie, K., and Xiong, L. (2010). Global expression profiling of rice microRNAs by  
1061 one-tube stem-loop reverse transcription quantitative PCR revealed important roles of

1062 microRNAs in abiotic stress responses. *Molecular Genetics and Genomics* 284, 477–488.

1063 Shen, J.C., Rideout, W.M., 3rd, and Jones, P.A. (1992). High frequency mutagenesis by a DNA  
1064 methyltransferase. *Cell* 71, 1073–1080.

1065 Shepherd, C.T., Moran Lauter, A.N., and Scott, M.P. (2009). Determination of transgene copy  
1066 number by real-time quantitative PCR. *Methods Mol. Biol.* 526, 129–134.

1067 Soppe, W.J.J., Jasencakova, Z., Houben, A., Kakutani, T., Meister, A., Huang, M.S., Jacobsen,  
1068 S.E., Schubert, I., and Fransz, P.F. (2002). DNA methylation controls histone H3 lysine 9  
1069 methylation and heterochromatin assembly in Arabidopsis. *EMBO J.* 21, 6549–6559.

1070 Stempor, P., and Ahringer, J. (2016). SeqPlots - Interactive software for exploratory data  
1071 analyses, pattern discovery and visualization in genomics. *Wellcome Open Res* 1, 14.

1072 Stroud, H., Greenberg, M.V.C., Feng, S., Bernatavichute, Y.V., and Jacobsen, S.E. (2013).  
1073 Comprehensive analysis of silencing mutants reveals complex regulation of the Arabidopsis  
1074 methylome. *Cell* 152, 352–364.

1075 Stroud, H., Do, T., Du, J., Zhong, X., Feng, S., Johnson, L., Patel, D.J., and Jacobsen, S.E.  
1076 (2014). Non-CG methylation patterns shape the epigenetic landscape in Arabidopsis. *Nat.*  
1077 *Struct. Mol. Biol.* 21, 64–72.

1078 Sved, J., and Bird, A. (1990). The expected equilibrium of the CpG dinucleotide in vertebrate  
1079 genomes under a mutation model. *Proc. Natl. Acad. Sci. U. S. A.* 87, 4692–4696.

1080 Takuno, S., and Gaut, B.S. (2013). Gene body methylation is conserved between plant  
1081 orthologs and is of evolutionary consequence. *Proc. Natl. Acad. Sci. U. S. A.* 110, 1797–1802.

1082 Takuno, S., Seymour, D.K., and Gaut, B.S. (2017). The Evolutionary Dynamics of Orthologs  
1083 That Shift in Gene Body Methylation between Arabidopsis Species. *Mol. Biol. Evol.* 34,  
1084 1479–1491.

1085 The Cold Spring Harbor Laboratory, Washington University Genome Sequencing Center, and  
1086 PE Biosystems Arabidopsis Sequencing Consortium (2000). The Complete Sequence of a  
1087 Heterochromatic Island from a Higher Eukaryote. *Cell* 100, 377–386.

1088 Toolkit, P. (2019). Broad institute, GitHub repository. See [Http://broadinstitute. Github. Io/picard](http://broadinstitute.github.io/picard).

1089 Tran, R.K., Henikoff, J.G., Zilberman, D., Ditt, R.F., Jacobsen, S.E., and Henikoff, S. (2005).  
1090 DNA methylation profiling identifies CG methylation clusters in Arabidopsis genes. *Curr. Biol.*  
1091 15, 154–159.

1092 Wang, L., Wang, C., Liu, X., Cheng, J., Li, S., Zhu, J.-K., and Gong, Z. (2019). Peroxisomal  
1093  $\beta$ -oxidation regulates histone acetylation and DNA methylation in Arabidopsis. *Proc. Natl. Acad.*  
1094 *Sci. U. S. A.* 116, 10576–10585.

1095 Wendte, J.M., Zhang, Y., Ji, L., Shi, X., Hazarika, R.R., Shahryary, Y., Johannes, F., and  
1096 Schmitz, R.J. (2019). Epimutations are associated with CHROMOMETHYLASE 3-induced de  
1097 novo DNA methylation. *Elife* 8.

1098 Wierzbicki, A.T., Haag, J.R., and Pikaard, C.S. (2008). Noncoding transcription by RNA  
1099 polymerase Pol IVb/Pol V mediates transcriptional silencing of overlapping and adjacent genes.

1100 *Cell* **135**, 635–648.

1101 Williams, B.P., Pignatta, D., Henikoff, S., and Gehring, M. (2015). Methylation-sensitive  
 1102 expression of a DNA demethylase gene serves as an epigenetic rheostat. *PLoS Genet.* **11**,  
 1103 e1005142.

1104 Williams, B.P., Bechen, L.A., Pohlmann, D.A., and Gehring, M. (2021). Somatic DNA  
 1105 demethylation generates tissue-specific methylation states and impacts flowering time. *bioRxiv*  
 1106 doi: <https://doi.org/10.1101/2021.03.29.437569>.

1107 Woo, H.R., Dittmer, T.A., and Richards, E.J. (2008). Three SRA-domain methylcytosine-binding  
 1108 proteins cooperate to maintain global CpG methylation and epigenetic silencing in *Arabidopsis*.  
 1109 *PLoS Genet.* **4**, e1000156.

1110 Xing, H.-L., Dong, L., Wang, Z.-P., Zhang, H.-Y., Han, C.-Y., Liu, B., Wang, X.-C., and Chen,  
 1111 Q.-J. (2014). A CRISPR/Cas9 toolkit for multiplex genome editing in plants. *BMC Plant Biol.* **14**,  
 1112 327.

1113 Yang, L.-H., Wang, S.-L., Tang, L.-L., Liu, B., Ye, W.-L., Wang, L.-L., Wang, Z.-Y., Zhou, M.-T.,  
 1114 and Chen, B.-C. (2014). Universal stem-loop primer method for screening and quantification of  
 1115 microRNA. *PLoS One* **9**, e115293.

1116 Yelagandula, R., Stroud, H., Holec, S., Zhou, K., Feng, S., Zhong, X., Muthurajan, U.M., Nie, X.,  
 1117 Kawashima, T., Groth, M., et al. (2014). The histone variant H2A.W defines heterochromatin  
 1118 and promotes chromatin condensation in *Arabidopsis*. *Cell* **158**, 98–109.

1119 van Zanten, M., Koini, M.A., Geyer, R., Liu, Y., Brambilla, V., Bartels, D., Koornneef, M., Fransz,  
 1120 P., and Soppe, W.J.J. (2011). Seed maturation in *Arabidopsis thaliana* is characterized by  
 1121 nuclear size reduction and increased chromatin condensation. *Proc. Natl. Acad. Sci. U. S. A.*  
 1122 **108**, 20219–20224.

1123 Zemach, A., Kim, M.Y., Hsieh, P.-H., Coleman-Derr, D., Eshed-Williams, L., Thao, K., Harmer,  
 1124 S.L., and Zilberman, D. (2013). The *Arabidopsis* nucleosome remodeler DDM1 allows DNA  
 1125 methyltransferases to access H1-containing heterochromatin. *Cell* **153**, 193–205.

1126 Zhai, J., Bischof, S., Wang, H., Feng, S., Lee, T.-F., Teng, C., Chen, X., Park, S.Y., Liu, L.,  
 1127 Gallego-Bartolome, J., et al. (2015). A One Precursor One siRNA Model for Pol IV-Dependent  
 1128 siRNA Biogenesis. *Cell* **163**, 445–455.

1129 Zhang, X., Yazaki, J., Sundaresan, A., Cokus, S., Chan, S.W.-L., Chen, H., Henderson, I.R.,  
 1130 Shinn, P., Pellegrini, M., Jacobsen, S.E., et al. (2006). Genome-wide high-resolution mapping  
 1131 and functional analysis of DNA methylation in *Arabidopsis*. *Cell* **126**, 1189–1201.

1132 Zhang, Y., Wendte, J.M., Ji, L., and Schmitz, R.J. (2020). Natural variation in DNA methylation  
 1133 homeostasis and the emergence of epialleles. *Proc. Natl. Acad. Sci. U. S. A.* **117**, 4874–4884.

1134 Zhong, Z., Feng, S., Duttke, S.H., Potok, M.E., Zhang, Y., Gallego-Bartolomé, J., Liu, W., and  
 1135 Jacobsen, S.E. (2021). DNA methylation-linked chromatin accessibility affects genomic  
 1136 architecture in *Arabidopsis*. *Proc. Natl. Acad. Sci. U. S. A.* **118**.

1137 Zilberman, D. (2017). An evolutionary case for functional gene body methylation in plants and  
 1138 animals. *Genome Biol.* **18**, 87.

1139 Zilberman, D., Cao, X., and Jacobsen, S.E. (2003). ARGONAUTE4 control of locus-specific  
1140 siRNA accumulation and DNA and histone methylation. *Science* 299, 716–719.

1141 Zilberman, D., Gehring, M., Tran, R.K., Ballinger, T., and Henikoff, S. (2007). Genome-wide  
1142 analysis of *Arabidopsis thaliana* DNA methylation uncovers an interdependence between  
1143 methylation and transcription. *Nat. Genet.* 39, 61–69.

1144

1145 **Additional files**

1146

1147 **Supplementary File 1.**

1148 CG differentially methylated regions during development.

1149

1150 **Supplementary File 2.**

1151 CHG differentially methylated regions during development.

1152

1153 **Supplementary File 3.**

1154 Transcript levels in rCMT3 compared to wild type embryos.

1155

1156 **Supplementary File 4.**

1157 CHG differentially methylated regions in rCMT3 compared to wild type.

1158

1159 **Supplementary File 5.**

1160 Oligonucleotides used in this study.

1161

1162 **Supplementary File 6.**

1163 MethylC-seq and mRNA-seq mapping statistics.
