# Supplementary figures and images for: Repression of CHROMOMETHYLASE 3 prevents epigenetic collateral damage in Arabidopsis
Source: eLife journal article supplement (doi:10.7554/elife.69396), 2021-07-23

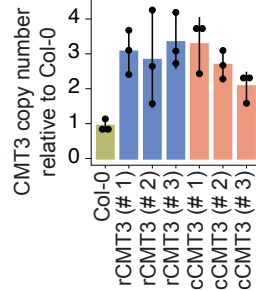

Supplement: supp [file elife-69396-supp-v2.zip]

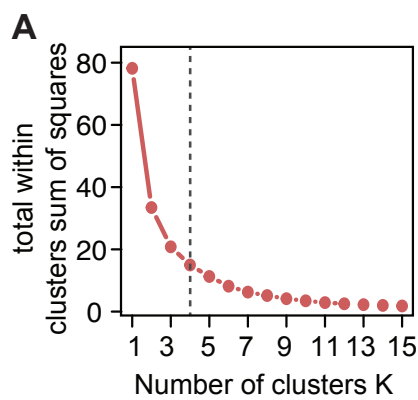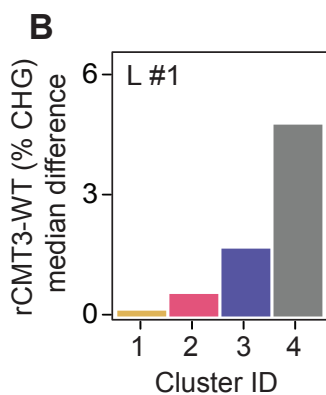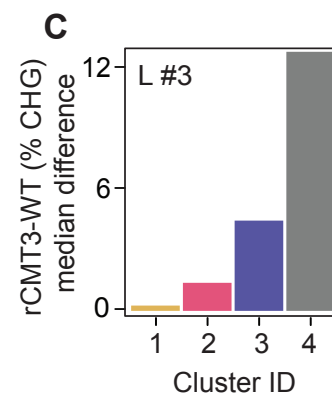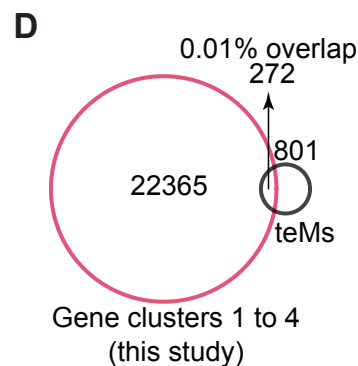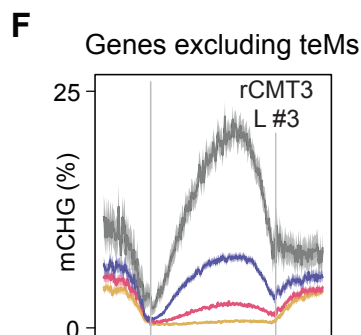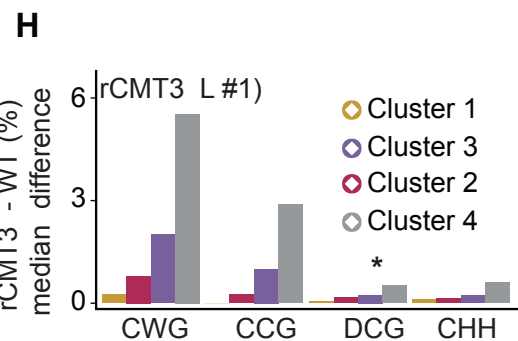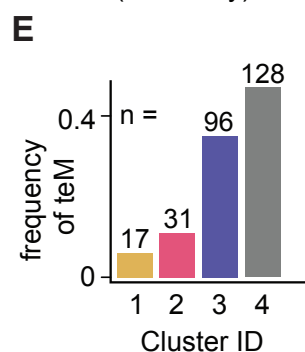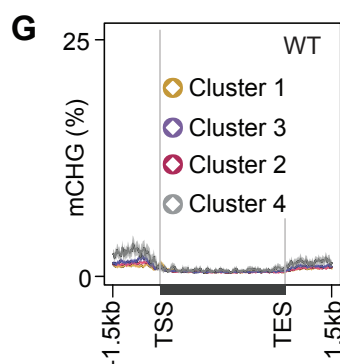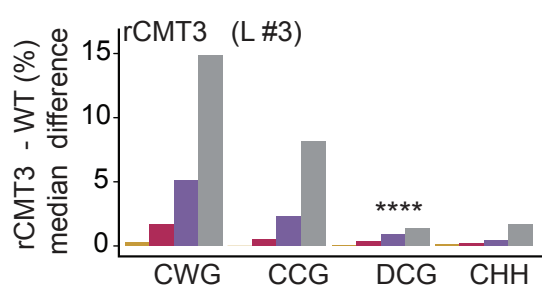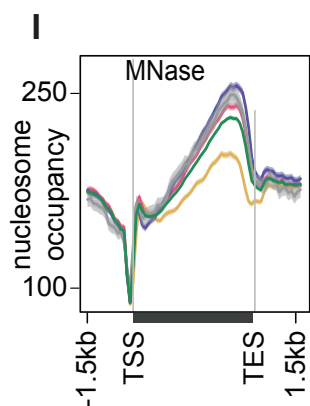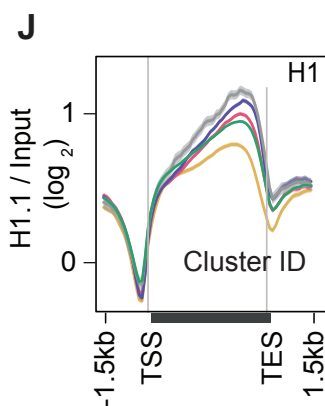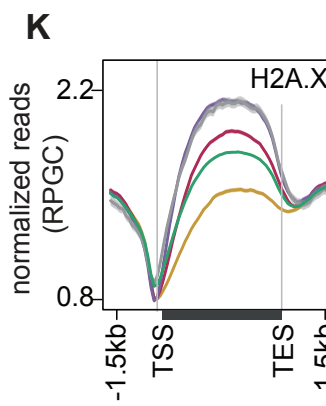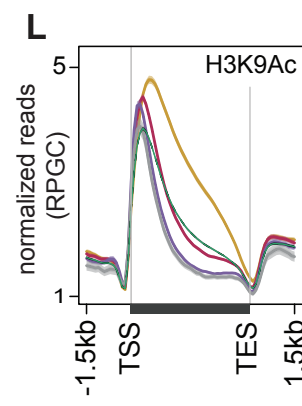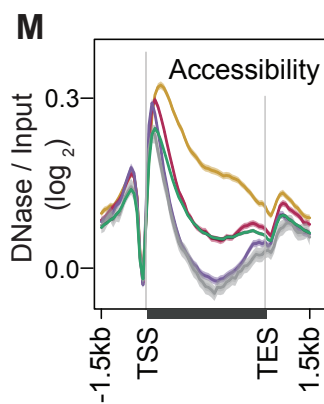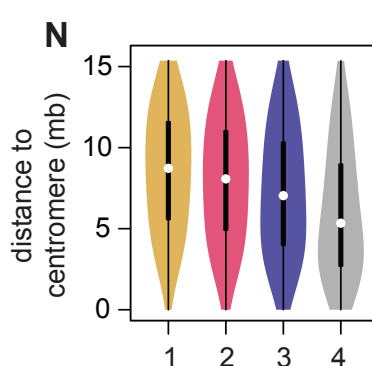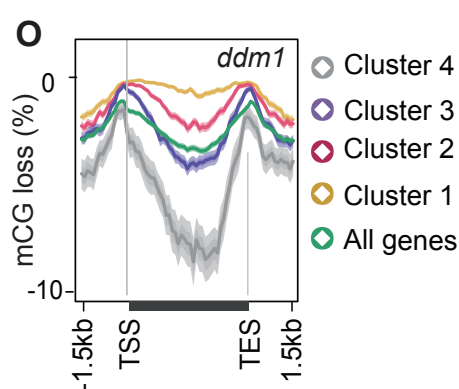

Supplement: supp [file elife-69396-supp-v2.zip]

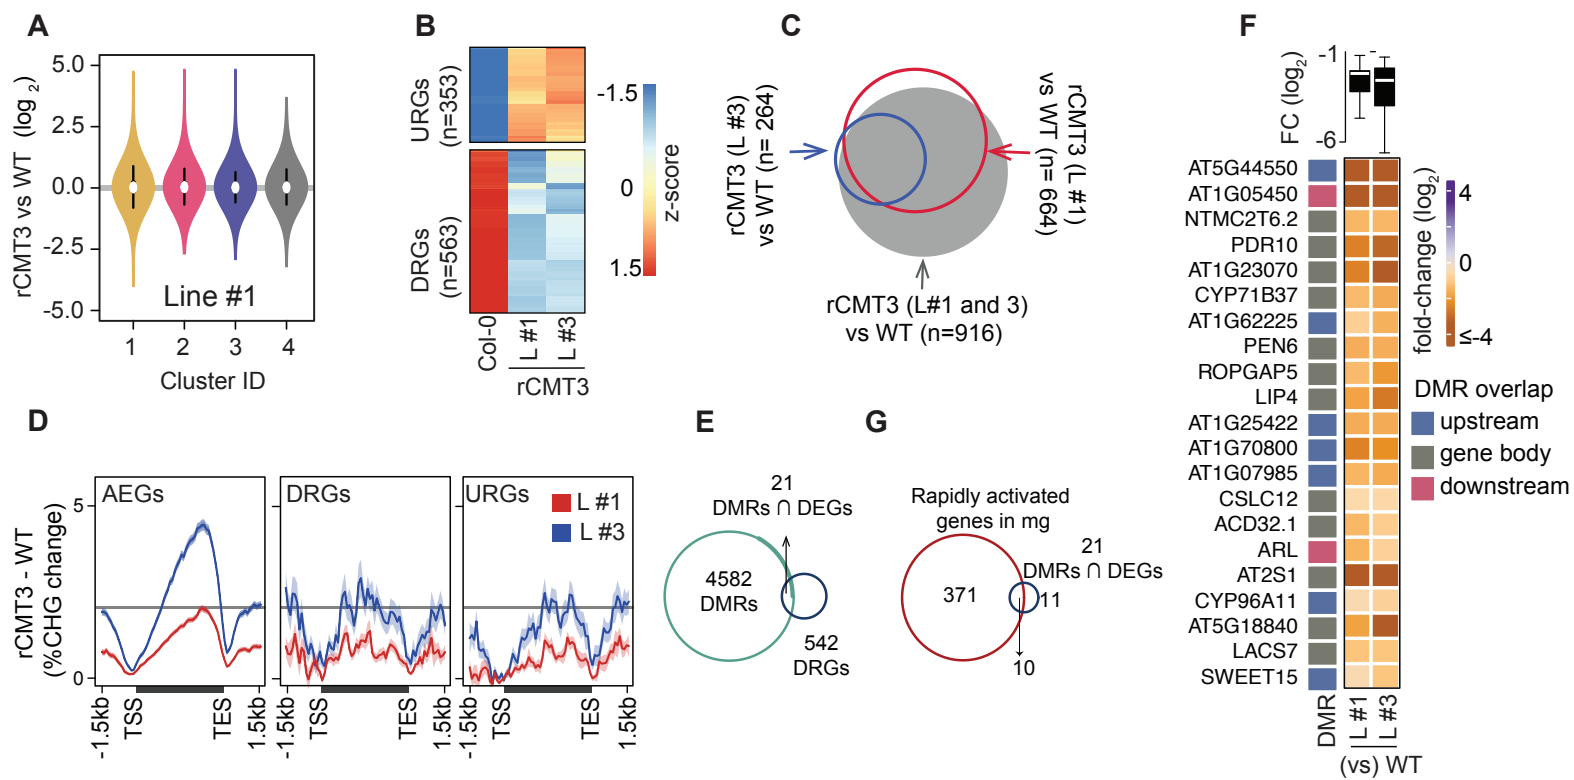

Supplement: supp [file elife-69396-supp-v2.zip]

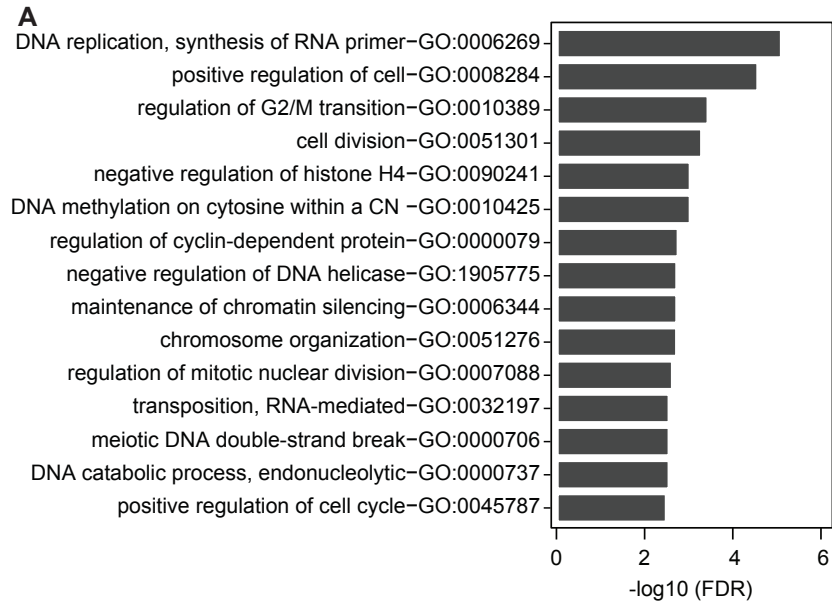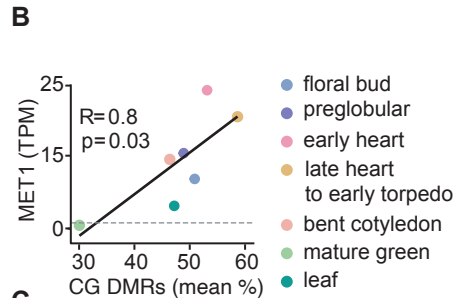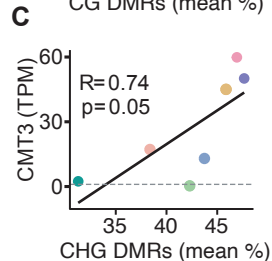

Supplement: supp [file elife-69396-supp-v2.zip]

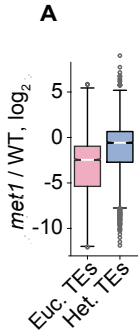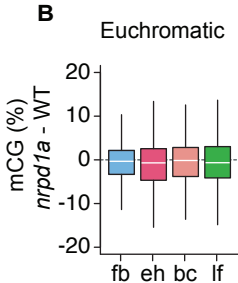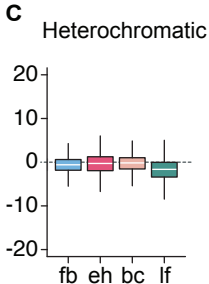

Supplement: supp [file elife-69396-supp-v2.zip]
